# Supplementary material
Source: publisher figshare collection journal article supplement (https://tandf.figshare.com/articles/dataset/_/7994036)
Supplement: Supplementary file 1 [file 1]

## Sheet: Sea fish
COMMON NAME	TAXONOMY	Level of microplastic contamination (sometimes average value)	Samples	Location and rationale	Method	Control/blank	Cross-contamination prevention	References
Albacore or longfin tuna	Thunnus alalunga	4 items/individual	31	From Mediterranean Sea	Stereo microscope	-	-	Wesch et al. , 2016 (Romeo T. et al., 2015)
European anchovy	Engraulis encrasicolus	-	3	Among most captured fish species and of economic importance. From English Channel	Hypochlorite digestion+ isolation of MP by sonication + stereo microscope + Raman spectroscopy	Controls of plastic particles and cotton	Nitrile gloves, work surfaces and dissection materials cleaned with ethanol 70 % and a white paper towel made of cellulose and lignin, air flow hood	Wesch et al., 2016 (Collard et al., 2015)
		0.18( ± 0.20) items/individual, in 14.28% of individuals (average of locations)	210 (including Sardina pilchardus)	From 14 locations alog the Spanish Mediterranean coast	dissection microscope + stereomicroscope + FT-IR	-	White 100% cotton laboratory coat and work areas, materials swiped clean with 96% alcohol between samples, samples stored in glass vials with deionized and micro-filtrated water Milli-Q	Compa et al., 2018
		9 items/8 individuals	13	From Mediterranean Sea (Gulf of Lions)	1) Degradation of the hepatic tissue: Frozen livers in 9 % NaClO + filtration + in methanol bath + ultrasonic bath+ filtration + centrifugation + Raman analyses 2) Cryosections of livers observed in polarized light microscopy + Raman analyses	3 blank samples (no polymer found)	All solutions filtered (5 μm). All dissection materials and work surfaces cleaned with 70 % ethanol.Air-flow cabine. During drying, plates put under a metal sifter (36 μm mesh).	Collard et al., 2017
Commerson's anchovy	Stolephorus commersonnii	-	16	From Punnapara in Alappuzha district, Kerala (India)	Microscope observation	-	-	Luscher A., 2015 (Kripa et al., 2014)
Areolate grouper	Epinephelus areolatus	1 items in 1 individual	5	Comparison of types of microplastic ingested by fish across different habitats in Saudi Arabian coast of Red Sea	Chemicaldigestion with NaOH + filtration ( 200 μm) + binocular stereoscope + FTIR	For each sample a petri dish with distilled water alongside the sample as contamination control. (0 to 3 fibers per blank sample)	Clean dissection tools wiped with 70% ethanol . Cotton clothing and cotton lab coats, gloves (nitrile) .	Baalkhuyur et al., 2018
Goldbanded jobfish	Pristipomoides multidens	2 items in 10 individuals	10	Comparison of types of microplastic ingested by fish across different habitats in Saudi Arabian coast of Red Sea	Chemicaldigestion with NaOH + filtration ( 200 μm) + binocular stereoscope + FTIR	For each sample a petri dish with distilled water alongside the sample as contamination control. (0 to 3 fibers per blank sample)	Clean dissection tools wiped with 70% ethanol . Cotton clothing and cotton lab coats, gloves (nitrile) .	Baalkhuyur et al., 2018
Common bluestripe snapper	Lutjanus kasmira	2 items in 12 individuals	12	Comparison of types of microplastic ingested by fish across different habitats in Saudi Arabian coast of Red Sea	Chemicaldigestion with NaOH + filtration ( 200 μm) + binocular stereoscope + FTIR	For each sample a petri dish with distilled water alongside the sample as contamination control. (0 to 3 fibers per blank sample)	Clean dissection tools wiped with 70% ethanol . Cotton clothing and cotton lab coats, gloves (nitrile) .	Baalkhuyur et al., 2018
Smalltooth emperor	Lethrinus microdon	2 items in 10 individuals	10	Comparison of types of microplastic ingested by fish across different habitats in Saudi Arabian coast of Red Sea	Chemicaldigestion with NaOH + filtration ( 200 μm) + binocular stereoscope + FTIR	For each sample a petri dish with distilled water alongside the sample as contamination control. (0 to 3 fibers per blank sample)	Clean dissection tools wiped with 70% ethanol . Cotton clothing and cotton lab coats, gloves (nitrile) .	Baalkhuyur et al., 2018
Blue-lined large-eye bream	Gymnocranius grandoculis	2 items in 10 individuals	10	Comparison of types of microplastic ingested by fish across different habitats in Saudi Arabian coast of Red Sea	Chemicaldigestion with NaOH + filtration ( 200 μm) + binocular stereoscope + FTIR	For each sample a petri dish with distilled water alongside the sample as contamination control. (0 to 3 fibers per blank sample)	Clean dissection tools wiped with 70% ethanol . Cotton clothing and cotton lab coats, gloves (nitrile) .	Baalkhuyur et al., 2018
Brownspotted grouper	Epinephelus chlorostigma	1 items in 3 individuals	3	Comparison of types of microplastic ingested by fish across different habitats in Saudi Arabian coast of Red Sea	Chemicaldigestion with NaOH + filtration ( 200 μm) + binocular stereoscope + FTIR	For each sample a petri dish with distilled water alongside the sample as contamination control. (0 to 3 fibers per blank sample)	Clean dissection tools wiped with 70% ethanol . Cotton clothing and cotton lab coats, gloves (nitrile) .	Baalkhuyur et al., 2018
Rosy dwarf monocle bream	Parascolopsis eriomma	3 items in 5 individuals	5	Comparison of types of microplastic ingested by fish across different habitats in Saudi Arabian coast of Red Sea	Chemicaldigestion with NaOH + filtration ( 200 μm) + binocular stereoscope + FTIR	For each sample a petri dish with distilled water alongside the sample as contamination control. (0 to 3 fibers per blank sample)	Clean dissection tools wiped with 70% ethanol . Cotton clothing and cotton lab coats, gloves (nitrile) .	Baalkhuyur et al., 2018
Oblique-banded grouper	Epinephelus radiatus	1 item in 7 individuals	7	Comparison of types of microplastic ingested by fish across different habitats in Saudi Arabian coast of Red Sea	Chemicaldigestion with NaOH + filtration ( 200 μm) + binocular stereoscope + FTIR	For each sample a petri dish with distilled water alongside the sample as contamination control. (0 to 3 fibers per blank sample)	Clean dissection tools wiped with 70% ethanol . Cotton clothing and cotton lab coats, gloves (nitrile) .	Baalkhuyur et al., 2018
Tang's snapper	Lipocheilus carnolabrum	2 items in 7 individuals	7	Comparison of types of microplastic ingested by fish across different habitats in Saudi Arabian coast of Red Sea	Chemicaldigestion with NaOH + filtration ( 200 μm) + binocular stereoscope + FTIR	For each sample a petri dish with distilled water alongside the sample as contamination control. (0 to 3 fibers per blank sample)	Clean dissection tools wiped with 70% ethanol . Cotton clothing and cotton lab coats, gloves (nitrile) .	Baalkhuyur et al., 2018
Blackspotted rubberlip	Plectorhinchus gaterinus	2 items in 6 individuals	6	Comparison of types of microplastic ingested by fish across different habitats in Saudi Arabian coast of Red Sea	Chemicaldigestion with NaOH + filtration ( 200 μm) + binocular stereoscope + FTIR	For each sample a petri dish with distilled water alongside the sample as contamination control. (0 to 3 fibers per blank sample)	Clean dissection tools wiped with 70% ethanol . Cotton clothing and cotton lab coats, gloves (nitrile) .	Baalkhuyur et al., 2018
Dotted grouper	Epinephelus epistictus	1 item in 5 individuals	5	Comparison of types of microplastic ingested by fish across different habitats in Saudi Arabian coast of Red Sea	Chemicaldigestion with NaOH + filtration ( 200 μm) + binocular stereoscope + FTIR	For each sample a petri dish with distilled water alongside the sample as contamination control. (0 to 3 fibers per blank sample)	Clean dissection tools wiped with 70% ethanol . Cotton clothing and cotton lab coats, gloves (nitrile) .	Baalkhuyur et al., 2018
Scissortail sergeant	Abudefduf sexfasciatus	1 item in 5 individuals	5	Comparison of types of microplastic ingested by fish across different habitats in Saudi Arabian coast of Red Sea	Chemicaldigestion with NaOH + filtration ( 200 μm) + binocular stereoscope + FTIR	For each sample a petri dish with distilled water alongside the sample as contamination control. (0 to 3 fibers per blank sample)	Clean dissection tools wiped with 70% ethanol . Cotton clothing and cotton lab coats, gloves (nitrile) .	Baalkhuyur et al., 2018
Skinnycheek lanternfish	Benthosema pterotum	1 item in 10 individuals	10	Comparison of types of microplastic ingested by fish across different habitats in Saudi Arabian coast of Red Sea	Chemicaldigestion with NaOH + filtration ( 200 μm) + binocular stereoscope + FTIR	For each sample a petri dish with distilled water alongside the sample as contamination control. (0 to 3 fibers per blank sample)	Clean dissection tools wiped with 70% ethanol . Cotton clothing and cotton lab coats, gloves (nitrile) .	Baalkhuyur et al., 2018
Atlantic bluefin tuna	Thunnus thynnus	16 items/individual	36	From Mediterranean Sea	Stereo microscope	-	-	Romeo T. et al., 2015
Broadbill wordfish	Xiphias gladius	9 items/individual	56	From Mediterranean Sea	Stereo microscope	-	-	Romeo T. et al., 2015
		< 0.1 item (%mass) in 1 positive individual	31	From central North Pacific	Visual examination	-	-	Wesch et al, 2016 (Choy and Drazen, 2013)
Yellowtail amberjack	Seriola lalandi	1 item/individual (2 positive individuals)	19	From North Pacific Central Gyre	Stereoscopic dissecting microscope	-	Positive pressure filtered air supply	Luscher A., 2015 (Gassel et al., 2013)
Pacific anchovy	Engraulis mordax	0.3 (±0.5) items/individual (3 positives)	10	comparison of data on the 2 sides of Pacific. From USA	KOH extraction +microscopic abservation	-	-	Rochman et al., 2015
Jacksmelt	Atherinopsis californiensis	1.6 (±3.7) items/individual (2 positives)	7	Comparison of data on the 2 sides of Pacific. From USA	KOH extraction +microscopic abservation	-	-	Rochman et al., 2015
Yellowtail Rockfish	Sebastes flavidus	0.3 (±0.6) items/individual (1 positive)	3	Comparison of data on the 2 sides of Pacific. From USA	KOH extraction +microscopic abservation	-	-	Rochman et al., 2015
Red bandfish	Cepola macrophthalma	2.15 (±2.0) items/individual (in 20 positives)	62	Comparison between pelagic and demersal fish from English Channel	Dissecting microscope +FTIR	-	Work surfaces thoroughly cleaned with alcohol, hands and forearms scrubbed. Gloves (nitrile), instruments cleaned after every specimen. Plastic zip lock bags for samples. All instruments and equipment checked under microscope prior use.	Lusher, 2015-Nerland et al., 2014 (Lusher et al., 2013)
Brazilian silversides	Atherinella brasiliensis	0.03-0.05 items/individual (average on all)	405	Screening 2 areas in two tropical Brazilian estuaries	Stereoscopic microscope	-	Petri dishes and tweezers thoroughly cleaned with alcohol. Disposable gloves	Vendel et al., 2017
		-	405	Comparison of 2 estuaries	Stereoscopic microscope	-	-	Alves et al., 2016
Chilean silverside	Odontesthes regia	1 item in 1 individual out of 9	9	To establish the first baseline of microplastic contamination in fish from the South American Pacific coastrom (Chile)	Gut content examined with dissecting microscope + FTIR-ATR	-	All tools thoroughly cleaned with ethanol and checked under the dissecting microscope	Ory et al., 2018
Striped bass	Morone saxatilis	0.9 (±1.2) items/individual (2 positives)	7	Comparison of data on the 2 sides of Pacific. From USA	KOH extraction +microscopic abservation	-	-	Rochman et al., 2015
Atlantic cod	Gadus morhua	1–2 items/individual (10 positives)	80	Different geographical positions in the North Sea	KOH extraction + stereo microscope	-	Clean air cabinet	Luscher A., 2015-Wesch et al., 2016 (Foekema et al., 2013)
		0-1 items in 1 positive individual	81	From North Sea and Baltic Sea	Stereo microscope + ATR-FTIR and FPA-based μ-FTI	10 individual procedural blank controls with distilled water. Ambient air blank controls	Cotton lab coat, gloves, instruments cleaned with ethanol, samples covered with aluminium foil or glass lid	Wesch et al., 2016 (Rummel et al., 2016)
		0–2 items/individual (7 items/5 individuals)	205	From local fish harvesters in Newfoundland, Canada	KOH digestion + microscope +FTIR	-	Tools rinsed or wiped with water and paper cloths. Hands washed, lab coats worn, and hair tied back. Hands and tools examined for adhered microplastics	Liboiron et al., 2016
		3 items in 9 positive individual	302	From six different locations along the Norwegian coast	Stereomicroscope + FTIR	Control petri dishes containing wet white filter	Work surfaces and tools cleaned with ethanol, all equipment checked under microscope for particulate contamination. Cotton lab coats cleaned with “sticky roller” and easily recognisable blue nitrile gloves used for dissections	Bråte et al., 2016
Polar cod	Boreogadus saida	1 particle/individual (on 2 individuals) 2.3 ± 2.1 - 10.9 ± 5.3 fibers/individual [control: 1.7 ± 1.9 - 5.1 ± 12.7 fibers/individual]	72	From underneath sea ice in the Eurasian Basin and in open waters around Svalbard (Arctic ocean)	Stereomicroscope + µFTIR	Control petri dish filled with deionised water placed next to stereomicroscope and checked after samples	Plastic sheet umbrella to cover sample.Scissors, tweezers, sieves and dishes rinsed with deionised water and inspectedwith stereomicroscope before use. Cleaning workspace, wearing blue cotton lab coats, and as short as possible exposure of samples. Samples covered with clean glass lid when possible	Kühn et al., 2018
Madamango sea catfish	Cathorops spixii	0.47 items/individual (11 positives)	60	From a tropical estuary of the Brazilian Northeast	Binoculars	-	-	Luscher A., 2015-Nerland et al., 2014 (Possatto et al., 2011)
Sea catfish or Bagre gaivota	Cathorops agassizii	0.55 items/individual (20 positives)	60	From a tropical estuary of the Brazilian Northeast	Binoculars	-	-	Luscher A., 2015-Nerland et al., 2014 (Possatto et al., 2011)
Lingcod	Ophiodon elongatus	0.1 (±0.3) items/individual (1 positive)	11	Comparison of data on the 2 sides of Pacific. From USA	KOH extraction +microscopic abservation + FTIR	-	-	Rochman et al., 2015
Poor cod	Trisopterus minutus	1.95 (±1.2) items/individual (in 20 positives)	50	Comparison between pelagic and demersal fish from English Channel	Dissecting microscope +FTIR	-	Work surfaces thoroughly cleaned with alcohol, hands and forearms scrubbed. Gloves (nitrile), instruments cleaned after every specimen. Plastic zip lock bags for samples. All instruments and equipment checked under microscope prior use.	Lusher, 2015-Nerland et al., 2014 (Lusher et al., 2013)
Pacific saury	Cololabis saira	3.2 (±3.05) items/positive individual	52	From North Pacific Central Gyre	Dissecting microscope	-	-	Luscher A., 2015-Nerland et al., 2014 (Boerger et al., 2010)
Common dab	Limanda limanda	0-1 items/individual (4 positives)	89	From North Sea and Baltic Sea	Stereo microscope + ATR-FTIR and FPA-based μ-FTI	10 individual procedural blank controls with distilled water. Ambient air blank controls	Cotton lab coat, gloves, instruments cleaned with ethanol, samples covered with aluminium foil or glass lid	Wesch et al., 2016 (Rummel et al., 2016)
Red gurnard	Chelidonichthys cuculus	1.94 (±1.3) items/individual (in 34 positives)	66	Comparison between pelagic and demersal fish from English Channel	Dissecting microscope +FTIR	-	Work surfaces thoroughly cleaned with alcohol, hands and forearms scrubbed. Gloves (nitrile), instruments cleaned after every specimen. Plastic zip lock bags for samples. All instruments and equipment checked under microscope prior use.	Lusher, 2015-Wesch et al., 2016 (Lusher et al., 2013)
Haddock	Melanogrammus aeglefinus	1.0 items/individual (6 positives)	97	Different geographical positions in the North Sea	KOH extraction + stereo microscope	-	Clean air cabinet	Luscher A., 2015-Wesch et al., 2016 (Foekema et al., 2013)
John dory	Zeus faber	2.65 (±2.5) items/individual (in 20 positives)	42	Comparison between pelagic and demersal fish from English Channel	Dissecting microscope +FTIR	-	Work surfaces thoroughly cleaned with alcohol, hands and forearms scrubbed. Gloves (nitrile), instruments cleaned after every specimen. Plastic zip lock bags for samples. All instruments and equipment checked under microscope prior use.	Lusher, 2015-Nerland et al., 2014 (Lusher et al., 2013)
		1 item in 1 individual	1	From off the coast of Portugal (on board stern trawlers on 7 occasions)	Dissection under stereoscopic microscope + µ-FTIR	-	Swift fish opening, Petri dish, latex gloves, glass and metal ware, cotton labcoats and clothing	Neves et al., 2015
European flounder	Platichthys flesus	0-1 items/individual (2 positives)	36	From North Sea and Baltic Sea	Stereo microscope + ATR-FTIR and FPA-based μ-FTI	10 individual procedural blank controls with distilled water. Ambient air blank controls	Cotton lab coat, gloves, instruments cleaned with ethanol, samples covered with aluminium foil or glass lid	Wesch et al., 2016 (Rummel et al., 2016)
		0.18 ± 0.55 items/individual (on 5 positives)	40	From Mondego estuary (Portugal)	Visual inspection + digestion with 10% KOH + filtration (1.2 μm) + stereomicroscope + μ-FTIR	During inspection under stereomicroscope, three clean Petri dishes on side of the sample as contaminant controls. During digestion procedures, three procedural blanks run without tissues in parallel with samples	All laboratory material cleaned with filtered purified water. Cotton laboratory coats. Use of plastic material avoided whenever possible.Laboratory with restricted access.	Bessa et al., 2018
Two-banded Seabream or Blacktail Bream	Diplodus vulgaris	3.14 ± 3.25 items/individual (on 29 positives)	40	From Mondego estuary (Portugal)	Visual inspection + digestion with 10% KOH + filtration (1.2 μm) + stereomicroscope + μ-FTIR	During inspection under stereomicroscope, three clean Petri dishes on side of the sample as contaminant controls. During digestion procedures, three procedural blanks run without tissues in parallel with samples	All laboratory material cleaned with filtered purified water. Cotton laboratory coats. Use of plastic material avoided whenever possible.Laboratory with restricted access.	Bessa et al., 2018
European seabass	Dicentrarchus labrax	0.30 ± 0.61 items/individual (on 9 positives)	40	From Mondego estuary (Portugal)	Visual inspection + digestion with 10% KOH + filtration (1.2 μm) + stereomicroscope + μ-FTIR	During inspection under stereomicroscope, three clean Petri dishes on side of the sample as contaminant controls. During digestion procedures, three procedural blanks run without tissues in parallel with samples	All laboratory material cleaned with filtered purified water. Cotton laboratory coats. Use of plastic material avoided whenever possible.Laboratory with restricted access.	Bessa et al., 2018
Acoupa weakfish or blacktail basher or grey snapper	Cynoscion acoupa	0- 63 items/individual (average: 3.03 ± 4.06 in 51% of individuals)	551	From Goiana Estuary (main channel, mangrove creeks and coastal area), South America	Visual identification with stereomicroscope	-	100% cotton lab coats and disposable latex gloves.Laboratory instruments washed in distilled water, oven dried and checked for contamination.	Ferreira et al., 2018
Atlantic herring	Clupea harengus	1–4 items/individual (8 positives)	566	Different geographical positions in the North Sea	KOH extraction + stereo microscope	-	Clean air cabinet	Wesch et al., 2016 (Foekema et al., 2013)
		1–4 items/individual	3	Among most captured fish species and of economic importance. From North Sea	Hypochlorite digestion+ isolation of MP by sonication + stereo microscope + Raman spectroscopy	Controls of plastic particles and cotton	Nitrile gloves, work surfaces and dissection materials cleaned with ethanol 70 % and a white paper towel made of cellulose and lignin, air flow hood	Wesch et al., 2016 (Collard et al., 2015)
		-	2	From Mediterranean Sea (Gulf of Lions)	1) Degradation of the hepatic tissue: Frozen livers in 9 % NaClO + filtration + in methanol bath + ultrasonic bath+ filtration + centrifugation + Raman analyses 2) Cryosections of livers observed in polarized light microscopy + Raman analyses	3 blank samples (no polymer found)	All solutions filtered (5 μm). All dissection materials and work surfaces cleaned with 70 % ethanol.Air-flow cabine. During drying, plates put under a metal sifter (36 μm mesh).	Collard et al., 2017
		0.25 (± 0.52) items/individual (in 63 individuals out of 299 analysed)	299 (in 8 years samplings)	Long-term study on microplastic in Baltic Sea	Digestion in 30% KOH and NaClO + filtration (1 mm + 300 μm + 100 μm) + dissection microscope	Controls for every five samples; blank samples processed using pre-filtered (20 μm) water. (3 cellulosic and/or semi-synthetic particles found in 162 control samples).Potential loss of plastics during filtration: 50 standard samples filtered (100 μm) and visually inspected under a light microscope (No plastic particles).	All laboratory equipment rinsed with acetone. Direct contact with samples and filters and use of plastic wash bottles avoided. Fume hood which kept closed as much as possible.	Beer et al., 2018
Atlantic thread herring	Opisthonema oglinum	0.12-0.33 items/individual (average on all)	56	Screening 2 areas in two tropical Brazilian estuaries	Stereoscopic microscope	-	Petri dishes and tweezers thoroughly cleaned with alcohol. Disposable gloves	Vendel et al., 2017
Pacific thread herring	Opisthonema libertate	1 item in 2 individuals (out of 40)	40	To establish the first baseline of microplastic contamination in fish from the South American Pacific coastrom, (Ecuador)	Gut content examined with dissecting microscope + FTIR-ATR	-	All tools thoroughly cleaned with ethanol and checked under the dissecting microscope	Ory et al., 2018
Silver-stripe round herring	Spratelloides gracilis	1.1 (±1.7) items/individual (4 positives)	10	Comparison of data on the 2 sides of Pacific. From Indonesia	KOH extraction +microscopic abservation	-	-	Rochman et al., 2015
Bahia sprat	Rhinosardinia bahiensis	0.14-0.35 items/individual (average on all)	179	Screening 2 areas in two tropical Brazilian estuaries	Stereoscopic microscope	-	Petri dishes and tweezers thoroughly cleaned with alcohol. Disposable gloves	Vendel et al., 2017
European sprat	Sprattus sprattus	0.21 (± 0.47) items/individual (in 97 individuals out of 515)	515	Long-term study on microplastic in Baltic Sea	Digestion in 30% KOH and NaClO + filtration (1 mm + 300 μm + 100 μm) + dissection microscope	Controls for every five samples; blank samples processed using pre-filtered (20 μm) water. (3 cellulosic and/or semi-synthetic particles found in 162 control samples).Potential loss of plastics during filtration: 50 standard samples filtered (100 μm) and visually inspected under a light microscope (No plastic particles).	All laboratory equipment rinsed with acetone. Direct contact with samples and filters and use of plastic wash bottles avoided. Fume hood which kept closed as much as possible.	Beer et al., 2018
Sprat	Clupea sprattus	2 items in 1 individual	141	From Southern Bight (southern North Sea,between coasts of the Netherlands, Belgium, France and Great Britain)	Digestion with 10% KOH + filtration (20 μm) + visual inspection with microscope + FTIR	Clean Petri dishes placed on either side of sample during visual inspection as contamination controls. Blanks taken regularly, to pinpoint any contamination during the process (8 blanks). A different set of controls taken each time new batch of fish was into the flow cabinet for dissection. Positive controls included, to ensure method is suitable for detecting microplastics	All materials washed, rinsed with purified water, and moved into a laminar flow cabinet. Clean dissection tools. 100% cotton clothing (both lab coats, as well as daily clothing worn underneath). All dissections performed in flow cabinet. Fish rinsed thoroughly.	Hermsen, 2017
Rio anchovy	Anchoa januaria	0-0.05 items/individual (average on all)	194	Screening 2 areas in two tropical Brazilian estuaries	Stereoscopic microscope	-	Petri dishes and tweezers thoroughly cleaned with alcohol. Disposable gloves	Vendel et al., 2017
Marini's anchovy	Anchoa marinii	0-0.05 items/individual (average on all)	22	Screening 2 areas in two tropical Brazilian estuaries	Stereoscopic microscope	-	Petri dishes and tweezers thoroughly cleaned with alcohol. Disposable gloves	Vendel et al., 2017
Zabaleta anchovy	Anchovia clupeoides	0-0.13 items/individual (average on all)	10	Screening 2 areas in two tropical Brazilian estuaries	Stereoscopic microscope	-	Petri dishes and tweezers thoroughly cleaned with alcohol. Disposable gloves	Vendel et al., 2017
Atlantic sabretooth anchovy	Lycengraulis grossidens	0.17-0.20 items/individual (average on all)	146	Screening 2 areas in two tropical Brazilian estuaries	Stereoscopic microscope	-	Petri dishes and tweezers thoroughly cleaned with alcohol. Disposable gloves	Vendel et al., 2017
Pacific anchoveta	Cetengraulis mysticetus	1 item in 1 individual (out of 30)	30	To establish the first baseline of microplastic contamination in fish from the South American Pacific coastrom, (Colombia)	Gut content examined with dissecting microscope + FTIR-ATR	-	All tools thoroughly cleaned with ethanol and checked under the dissecting microscope	Ory et al., 2018
Anchoveta	Engraulis ringens	1 item in 1 individual (out of 13)	13	To establish the first baseline of microplastic contamination in fish from the South American Pacific coastrom, (Chile)	Gut content examined with dissecting microscope + FTIR-ATR	-	All tools thoroughly cleaned with ethanol and checked under the dissecting microscope	Ory et al., 2018
Shrimp scad	Alepes djedaba	8.00 ± 1.22 item/10 g fish muscle (all individuals positive)	20	Popular commercial fish species from Persian Gulf, from fishmongers at Khark Island	Digestion with 10% (w/v) KOH + filtration (<2 μm) + binocular microscope	Digestion procedures without any fish muscles as blank. Glass petri dish in the clean cabinet as a control for airborne contamination.	Sterile or clean devices. Tap water and KOH solution filtered prior to use. Cotton laboratory coat (100%). Samples covered.	Akhbarizadeh et al., 2018
Orange-spotted grouper	Epinephelus coioides	7.75 ± 2.16 items/10 g fish muscle (all individuals positive)	20	Popular commercial fish species from Persian Gulf, from fishmongers at Khark Island	Digestion with 10% (w/v) KOH + filtration (<2 μm) + binocular microscope	Digestion procedures without any fish muscles as blank. Glass petri dish in the clean cabinet as a control for airborne contamination.	Sterile or clean devices. Tap water and KOH solution filtered prior to use. Cotton laboratory coat (100%). Samples covered.	Akhbarizadeh et al., 2018
Pickhandle barracuda	Sphyraena jello	5.66 ± 1.69 items/10 g fish muscle (all individuals positive)	15	Popular commercial fish species from Persian Gulf, from fishmongers at Khark Island	Digestion with 10% (w/v) KOH + filtration (<2 μm) + binocular microscope	Digestion procedures without any fish muscles as blank. Glass petri dish in the clean cabinet as a control for airborne contamination.	Sterile or clean devices. Tap water and KOH solution filtered prior to use. Cotton laboratory coat (100%). Samples covered.	Akhbarizadeh et al., 2018
Bartail flathead	Platycephalus indicus	18.50 ± 4.55 item/10 g fish muscle (all individuals positive)	16	Popular commercial fish species from Persian Gulf, from fishmongers at Khark Island	Digestion with 10% (w/v) KOH + filtration (<2 μm) + binocular microscope	Digestion procedures without any fish muscles as blank. Glass petri dish in the clean cabinet as a control for airborne contamination.	Sterile or clean devices. Tap water and KOH solution filtered prior to use. Cotton laboratory coat (100%). Samples covered.	Akhbarizadeh et al., 2018
		21.8 items/individual (sum of skin, muscle, gut, gills, liver - average on all individuals)	12	From 5 sites in coastal waters of Persian Gulf	Digestion with 35% H2O2 and 4% KOH, plus 68% HClO4 and 65% HNO3 (plus sodium iodide for digestion of gastrointestinal tract) + filtration + binocular microscope + high vacuum SEM/EDS	-	-	Abbasi et al., 2018
Greater lizardfish	Saurida tumbil	13.5 items/individual (sum of skin, muscle, gut, gills, liver - average on all individuals)	4	From 5 sites in coastal waters of Persian Gulf	Digestion with 35% H2O2 and 4% KOH, plus 68% HClO4 and 65% HNO3 (plus sodium iodide for digestion of gastrointestinal tract) + filtration + binocular microscope + high vacuum SEM/EDS	-	-	Abbasi et al., 2018
Silver sillago	Sillago sihama	14.1 items/individual (sum of skin, muscle, gut, gills, liver - average on all individuals)	17	From 5 sites in coastal waters of Persian Gulf	Digestion with 35% H2O2 and 4% KOH, plus 68% HClO4 and 65% HNO3 (plus sodium iodide for digestion of gastrointestinal tract) + filtration + binocular microscope + high vacuum SEM/EDS	-	-	Abbasi et al., 2018
Three-lined tongue sole	Cynoglossus abbreviatus	12 items/individual (sum of skin, muscle, gut, gills, liver - average on all individuals)	11	From 5 sites in coastal waters of Persian Gulf	Digestion with 35% H2O2 and 4% KOH, plus 68% HClO4 and 65% HNO3 (plus sodium iodide for digestion of gastrointestinal tract) + filtration + binocular microscope + high vacuum SEM/EDS	-	-	Abbasi et al., 2018
Slender halfbeak	Hyporhamphus roberti roberti	0-0.03 items/individual (average on all)	35	Screening 2 areas in two tropical Brazilian estuaries	Stereoscopic microscope	-	Petri dishes and tweezers thoroughly cleaned with alcohol. Disposable gloves	Vendel et al., 2017
Atlantic silverstripe halfbeak	Hyporhamphus unifasciatus	0.14-0.15 items/individual (average on all)	209	Screening 2 areas in two tropical Brazilian estuaries	Stereoscopic microscope	-	Petri dishes and tweezers thoroughly cleaned with alcohol. Disposable gloves	Vendel et al., 2017
Leatherjacket fish	Oligoplites saurus	0-0.017 items/individual (average on all)	22	Screening 2 areas in two tropical Brazilian estuaries	Stereoscopic microscope	-	Petri dishes and tweezers thoroughly cleaned with alcohol. Disposable gloves	Vendel et al., 2017
Irish mojarra	Diapterus auratus	0.97 items/individual (average on all)	29	Screening 2 areas in two tropical Brazilian estuaries	Stereoscopic microscope	-	Petri dishes and tweezers thoroughly cleaned with alcohol. Disposable gloves	Vendel et al., 2017
Caitipa mojarra	Diapterus rhombeus	0.12 ± 0.08 nylon items/individual (5 positives	44	From tropical estuary in Northeast Brazil	Visual	-	-	Luscher A., 2015-Wesch et al., 2016 (Ramos et al., 2012)
		0-0.06 items/individual (average on all)	31	Screening 2 areas in two tropical Brazilian estuaries	Stereoscopic microscope	-	Petri dishes and tweezers thoroughly cleaned with alcohol. Disposable gloves	Vendel et al., 2017
Spotfin mojarra	Eucinostomus argenteus	0-0.02 items/individual (average on all)	98	Screening 2 areas in two tropical Brazilian estuaries	Stereoscopic microscope	-	Petri dishes and tweezers thoroughly cleaned with alcohol. Disposable gloves	Vendel et al., 2017
Flagfin mojarra	Eucinostomus melanopterus	0.07 ± 0.06 nylon items/individual (13 positives	141	From tropical estuary in Northeast Brazil	Visual	-	-	Luscher A., 2015-Wesch et al., 2015 (Ramos et al., 2012)
Brazilian mojarra	Eugerres brasilianus	0.16 ± 0.06 nylon items/individual (39 positives	240	From tropical estuary in Northeast Brazil	Visual	-	-	Luscher A., 2015 (Ramos et al., 2012)
		0-0.06 items/individual (average on all)	64	Screening 2 areas in two tropical Brazilian estuaries	Stereoscopic microscope	-	Petri dishes and tweezers thoroughly cleaned with alcohol. Disposable gloves	Vendel et al., 2017
White mullet	Mugil curema	0-0.01 items/individual (average on all)	186	Screening 2 areas in two tropical Brazilian estuaries	Stereoscopic microscope	-	Petri dishes and tweezers thoroughly cleaned with alcohol. Disposable gloves	Vendel et al., 2017
Lined sole	Achirus lineatus	0-0.5 items/individual (average on all)	10	Screening 2 areas in two tropical Brazilian estuaries	Stereoscopic microscope	-	Petri dishes and tweezers thoroughly cleaned with alcohol. Disposable gloves	Vendel et al., 2017
Tessellated tonguefish	Symphurus tessellatus	0-0.025 items/individual (average on all)	26	Screening 2 areas in two tropical Brazilian estuaries	Stereoscopic microscope	-	Petri dishes and tweezers thoroughly cleaned with alcohol. Disposable gloves	Vendel et al., 2017
Atlantic mackerel	Scomber scombrus	3 particles and 3 fibers/13 individuals (4 positives) (average: 0.46 ± 0.78 items/individual)	13	From off the coast of Portugal (fish collected on board stern trawlers on 7 occasions)	Dissection under stereoscopic microscope + µ-FTIR	-	Swift fish opening, Petri dish, latex gloves, glass and metal ware, cotton labcoats and clothing	Neves et al., 2015
		0-3 items/individual (9 positives)	51	From North Sea and Baltic Sea	Stereo microscope + ATR-FTIR and FPA-based μ-FTI	Control blanks	Cotton lab coat, gloves, instruments cleaned with ethanol, samples covered with aluminium foil or glass lid	Wesch et al., 2016 (Rummel et al., 2016)
		1-4 items/individual (18 items in 10 positive individuals)	31	From a local supplier, caught within Celtic Sea/English Channel/Western Approaches	Microscope	-	Pots ad equipmenet rinsed.Cotton lab coat and gloves . Work surfaces wiped with 70% ethanol. Positive pressure laminar flow hood	Nelms et al., 2018
Atlantic horse mackerel	Trachurus trachurus	1.0 items in 1 positive individual	100	Different geographical positions in the North Sea	KOH extraction + stereo microscope	-	Clean air cabinet	Luscher A., 2015-Nerland et al., 2014 (Foekema et al., 2013)
		1.5 (±0.7) items/individual (in 16 positives)	56	Comparison between pelagic and demersal fish from English Channel	Dissecting microscope +FTIR	-	Work surfaces thoroughly cleaned with alcohol, hands and forearms scrubbed. Gloves (nitrile), instruments cleaned after every specimen. Plastic zip lock bags for samples. All instruments and equipment checked under microscope prior use.	Luscher A., 2015-Nerland et al., 2014 (Lusher et al., 2013)
		0.07 ± 0.25 items/individual (2 particles and 1 fiber/44 individuals - 3 positives)	44	From off the coast of Portugal (fish collected on board stern trawlers on 7 occasions)	Dissection under stereoscopic microscope + µ-FTIR	-	Swift fish opening, Petri dish, latex gloves, glass and metal ware, cotton labcoats and clothing	Neves et al., 2015
Indian mackerel	Rastrelliger kanagurta	1 (±1.1) items/individual (5 positives)	9	Comparison of data on the 2 sides of Pacific. From Indonesia	KOH extraction +microscopic abservation	-	-	Rochman et al., 2015
		0-1 items/individual (0 in 90% individuals) -> 1 item in 3 individuals out of 30	30	From from local markets in Malaysia. Species chosen as often caught from coastal waters of many Asian countries and some other parts of the world	Digestion with KOH (10% w/v) + filtration and density separation of bones (149 μm + 8 μm)+ stereomicroscope + micro-Raman spectroscopy + elemental analysis with energy-dispersive X-ray spectroscopy (EDX)	One procedural blank with 10% KOH tested simultaneously during the isolation procedure, and another procedural blank containing NaI solution tested simultaneously during the density separation process.	Cotton lab coat, nitrile gloves. All liquids filtered through a GF/D microfiber filter membrane (pore size 2.7 μm). Glassware and instruments washed with dishwashing liquid, rinsed with deionized water and with ethanol. Outer part of the fish rinsed with ultrapure deionized water and with ethanol. Work surface pre-cleaned with 70% ethanol. Horizontal laminar flow cabinet.	Karami et al., 2017
Greenback mullet	Chelon subviridis	0-3 items/individual (0 in 70% individuals)	30	From from local markets in Malaysia. Species chosen as often caught from coastal waters of many Asian countries and some other parts of the world	Digestion with KOH (10% w/v) + filtration and density separation of bones (149 μm + 8 μm)+ stereomicroscope + micro-Raman spectroscopy + elemental analysis with energy-dispersive X-ray spectroscopy (EDX)	One procedural blank with 10% KOH tested simultaneously during the isolation procedure, and another procedural blank containing NaI solution tested simultaneously during the density separation process.	Cotton lab coat, nitrile gloves. All liquids filtered through a GF/D microfiber filter membrane (pore size 2.7 μm). Glassware and instruments washed with dishwashing liquid, rinsed with deionized water and with ethanol. Outer part of the fish rinsed with ultrapure deionized water and with ethanol. Work surface pre-cleaned with 70% ethanol. Horizontal laminar flow cabinet.	Karami et al., 2017
Flathead grey mullet	Mugil cephalus	6 items from 5 individuals out of 30 (mean for wild: 4.3, mean for captive: 0.2)	30 + 30	Investigate the difference in microplastic intake in wild and captive mullets from eastern coast of Hong Kong ( near Sam Mun Tsai) and from fish farms	Digestion with 30% hydrogen peroxide + filtration and density separation of plastic particles by NaCl solution + filtration (11 µm) + stereomicroscope + FT-IR with universal attenuated total reflectance (UATR) sampling accessory	Filter paper soaked with deionised water placed in the laboratory environment to collect the background air-borne contamination. No plastic items detected from background air.	All equipment rinsed with deionised water. Saline solution and hydrogen peroxide filtered. Laboratory coats and gloves. Samples covered when not in use.	Cheung et al., 2018
Belanger’s croaker	Johnius belangerii	0-3 items/individual (0 in 60% individuals)	30	From from local markets in Malaysia. Species chosen as often caught from coastal waters of many Asian countries and some other parts of the world	Digestion with KOH (10% w/v) + filtration and density separation of bones (149 μm + 8 μm)+ stereomicroscope + micro-Raman spectroscopy + elemental analysis with energy-dispersive X-ray spectroscopy (EDX)	One procedural blank with 10% KOH tested simultaneously during the isolation procedure, and another procedural blank containing NaI solution tested simultaneously during the density separation process.	Cotton lab coat, nitrile gloves. All liquids filtered through a GF/D microfiber filter membrane (pore size 2.7 μm). Glassware and instruments washed with dishwashing liquid, rinsed with deionized water and with ethanol. Outer part of the fish rinsed with ultrapure deionized water and with ethanol. Work surface pre-cleaned with 70% ethanol. Horizontal laminar flow cabinet.	Karami et al., 2017
Spotty-face anchovy	Stolephorus waitei	1 item in 1 individual out of 30	30	From from local markets in Malaysia. Species chosen as often caught from coastal waters of many Asian countries and some other parts of the world	Digestion with KOH (10% w/v) + filtration and density separation of bones (149 μm + 8 μm)+ stereomicroscope + micro-Raman spectroscopy + elemental analysis with energy-dispersive X-ray spectroscopy (EDX)	One procedural blank with 10% KOH tested simultaneously during the isolation procedure, and another procedural blank containing NaI solution tested simultaneously during the density separation process.	Cotton lab coat, nitrile gloves. All liquids filtered through a GF/D microfiber filter membrane (pore size 2.7 μm). Glassware and instruments washed with dishwashing liquid, rinsed with deionized water and with ethanol. Outer part of the fish rinsed with ultrapure deionized water and with ethanol. Work surface pre-cleaned with 70% ethanol. Horizontal laminar flow cabinet.	Karami et al., 2017
Japanese anchovy	Engraulis japonicus	0-15 items/individual (average: 2.3(±2.5) items in 49 out of 64 individuals)	64	From Tokyo Bay	Digestion with 10% KOH + microscopic observation + FT-IR	1 procedural blank (no plastics). Petri dishes near work bench to collect airborne particles (3 polymer fibers, more than 10 cotton or wood fibers)	Samples sealed in a vial or Petri dishs	Tanaka and Takada, 2016
Snake mackerel	Gempylus serpens	-	104	From central North Pacific	Visual observation	-	-	Wesch et al., 2016 (Choy and Drazen, 2013)
Big-eye moonfish/opah	Lampris sp.	2.3 (±1.6) items/individual	115	From central North Pacific	Visual observation	-	-	Luscher A., 2015-Wesch et al., 2016 (Choy and Drazen, 2013)
Small-eye moonfish/opah	Lampris sp.	5.8 (±3.9) items/individual	24	From central North Pacific	Visual observation	-	-	Luscher A., 2015- Welsch et al., 2016 (Choy and Drazen, 2013)
Sardine or European pilchard	Sardina pilchardus	-	3	Among most captured fish species and of economic importance. From English Channel	Hypochlorite digestion+ isolation of MP by sonication + stereo microscope + Raman spectroscopy	Controls of plastic particles and cotton	Nitrile gloves, work surfaces and dissection materials cleaned with ethanol 70 % and a white paper towel made of cellulose and lignin, air flow hood	Wesch et al., 2016 (Collard et al., 2015)
		0.21( ± 0.23) items/individual, in 15.24% of individuals (average of locations)	210 (including Engraulis encrasicolus)	From 14 locations alog the Spanish Mediterranean coast	dissection microscope + stereomicroscope + FT-IR	-	White 100% cotton laboratory coat and work areas, materials swiped clean with 96% alcohol between samples, samples stored in glass vials with deionized and micro-filtrated water Milli-Q	Compa et al., 2018
		-	2	From Mediterranean Sea (Gulf of Lions)	1) Degradation of the hepatic tissue: Frozen livers in 9 % NaClO + filtration + in methanol bath + ultrasonic bath+ filtration + centrifugation + Raman analyses 2) Cryosections of livers observed in polarized light microscopy + Raman analyses	3 blank samples (no polymer found)	All solutions filtered (5 μm). All dissection materials and work surfaces cleaned with 70 % ethanol.Air-flow cabine. During drying, plates put under a metal sifter (36 μm mesh).	Collard et al., 2017
		3.75 items/individual (average on 4 positive individuals)	7	Survey over 10 location in the Turkish territorial waters of the Mediterranean Sea	Digestion with 35% hydrogen peroxide + filtration (26 μm) + Stereomicroscope +FTIR	Control petri dish in dissecting chamber treated in the same way as the rest of the samples	All dissections performed inside an infant incubator custom modified to serve as a sealed dissecting chamber. Latex gloves, glass and metal ware, and cotton lab coats.	Güven et al., 2017
		1.78 ± 0.7 items/individual (average on 19 positive individuals)	99	From Central and North Adriatic Sea	Extraction with NaCl hypersaline solution filtration + digestion with 15% H2O2 + microscopy observation + FT-IR	-	Deionized water and hypersaline solution pre-filtered (0.45 μm); all materials cleaned with filtered deionized water and air dried. All sample processing performed in a clean air flow cabinet	Avio et al., 2015
Brushtooth lizardfish	Saurida undosquamis	2.20 items/individual (average on 55 positive individuals)	99	Survey over 10 location in the Turkish territorial waters of the Mediterranean Sea	Digestion with 35% hydrogen peroxide + filtration (26 μm) + Stereomicroscope +FTIR	Control petri dish in dissecting chamber treated in the same way as the rest of the samples	All dissections performed inside an infant incubator custom modified to serve as a sealed dissecting chamber. Latex gloves, glass and metal ware, and cotton lab coats.	Güven et al., 2017
Picked dogfish	Squalus acanthias	1.25 ± 0.5 items/individual (average on 4 positive individuals)	9	From Central and North Adriatic Sea	Extraction with NaCl hypersaline solution filtration + digestion with 15% H2O2 + microscopy observation + FT-IR	-	Deionized water and hypersaline solution pre-filtered (0.45 μm); all materials cleaned with filtered deionized water and air dried. All sample processing performed in a clean air flow cabinet	Avio et al., 2015
Rabbitfish or Forktail rabbitfish	Siganus argenteus	0.5 (±0.7) items/individual (1 positive)	2	Comparison of data on the 2 sides of Pacific. From Indonesia	KOH extraction +microscopic abservation	-	-	Rochman et al., 2015
Rabbitfish or White-spotted spinefoot	Siganus canaliculatus	0.3 (±0.6) items/individual (1 positive)	3	Comparison of data on the 2 sides of Pacific. From Indonesia	KOH extraction +microscopic abservation	-	-	Rochman et al., 2015
Carangidae sp.	Carangidae sp.	5.9 (±5.1) items/individual (5 positives)	7	Comparison of data on the 2 sides of Pacific. From Indonesia	KOH extraction +microscopic abservation	-	-	Rochman et al., 2015
Blue rockfish	Sebastes mystinus	0.2 (±0.4) items/individual (2 positives)	10	Comparison of data on the 2 sides of Pacific. Form Usa	KOH extraction +microscopic abservation	-	-	Rochman et al., 2015
Chinook salmon	Oncorhynchus tshawytscha	0.25 (±0.5) items/individual (1 positive)	4	Comparison of data on the 2 sides of Pacific. From USA	KOH extraction +microscopic abservation	-	-	Rochman et al., 2015
Pacific sanddab	Citharichthys sordidus	1 (±1.2) items/individual (3 positives)	5	Comparison of data on the 2 sides of Pacific. From USA	KOH extraction +microscopic abservation	-	-	Rochman et al., 2015
Shortfin scad	Decapterus macrosoma	2.5 (±6.3) items/individual (5 positives)	17	Comparison of data on the 2 sides of Pacific. From Indonesia	KOH extraction +microscopic abservation	-	-	Rochman et al., 2015
Solenette	Buglossidium luteum	1.23 (±0.4) items/individual (in 13 positives)	50	Comparison between pelagic and demersal fish from English Channel	Dissecting microscope +FTIR	-	Work surfaces thoroughly cleaned with alcohol, hands and forearms scrubbed. Gloves (nitrile), instruments cleaned after every specimen. Plastic zip lock bags for samples. All instruments and equipment checked under microscope prior use.	Lusher, 2015-Nerland et al., 2014 (Lusher et al., 2013)
Broadbill swordfish	Xiphias gladius	-	31	From central North Pacific	Visual observation	-	-	Wesch et al., 2016 (Choy and Drazen, 2013)
Bigeye tuna	Thunnus obesus	3.4 ± 57.7 items (%mass)	35	From central North Pacific	Visual observation	-	-	Wesch et al., 2016 (Choy and Drazen, 2013)
Blue whiting	Micromesistius poutassou	2.07 (±0.9) items/individual (in 14 positives)	27	Comparison between pelagic and demersal fish from English Channel	Dissecting microscope +FTIR	-	Work surfaces thoroughly cleaned with alcohol, hands and forearms scrubbed. Gloves (nitrile), instruments cleaned after every specimen. Plastic zip lock bags for samples. All instruments and equipment checked under microscope prior use.	Lusher, 2015-Nerland et al., 2014-Wesch et al., 2016 (Lusher et al., 2013)
Whiting	Merlangius merlangus	1–3 items/individual (6 positives)	105	Different geographical positions in the North Sea	KOH extraction + stereo microscope	-	Clean air cabinet	Lusher, 2015 (Foekema et al., 2013)
		1.75 (±1.4) items/individual (in 16 positives)	50	Comparison between pelagic and demersal fish from English Channel	Dissecting microscope +FTIR	-	Work surfaces thoroughly cleaned with alcohol, hands and forearms scrubbed. Gloves (nitrile), instruments cleaned after every specimen. Plastic zip lock bags for samples. All instruments and equipment checked under microscope prior use.	Lusher, 2015 ( Lusher et al., 2013)
Loweina interrupta	Loweina interrupta	1 items/individual	28	From North Pacific Central Gyre	Dissecting microscope	-	-	Lusher, 2015-Nerland et al., 2014 (Boerger et al., 2010)
Golden lanternfish	Myctophum aurolaternatum	6.0 (±8.99) items/individual	40	From North Pacific Central Gyre	Dissecting microscope	-	-	Lusher, 2015-Nerland et al., 2014 (Boerger et al., 2010)
Reinhardt's lantern fish	Hygophum reinhardtii	1.3 (±0.71) items/individual	45	From North Pacific Central Gyre	Dissecting microscope	-	-	Lusher, 2015-Nerland et al., 2014 (Boerger et al., 2010)
Bigfin lanternfish	Symbolophorus californiensis	7.2 (±8.39) items/individual	78	From North Pacific Central Gyre	Dissecting microscope	-	-	Lusher, 2015-Nerland et al., 2014 (Boerger et al., 2010)
Diaphus anderseni	Diaphus anderseni	1 item/ individual (2 positives)	13	From North Pacific Subtropical Gyre	Dissecting microscope	Empty petri dishes.Blind spiked samples as control	-	Lusher, 2015 (Davison and Asch, 2011)
Coco’s lanternfish	Lobianchia gemellarii	1 item in 1 positive individual	3	From North Pacific Subtropical Gyre	Dissecting microscope	Empty petri dishes.Blind spiked samples as control	-	Lusher, 2015 (Davison and Asch, 2011)
Lanternfish	Diaphus fulgens	1 item/ individual (2 positives)	7	From North Pacific Subtropical Gyre	Dissecting microscope	Empty petri dishes.Blind spiked samples as control	-	Lusher, 2015 (Davison and Asch, 2011)
Boluin’s lanternfish	Diaphus phillipsi	1 item in 1 individual	1	From North Pacific Subtropical Gyre	Dissecting microscope	Empty petri dishes.Blind spiked samples as control	-	Lusher, 2015 (Davison and Asch, 2011)
Pearly lanternfish	Myctophum nitidulum	1.5 items/ individual (4 positives)	25	From North Pacific Subtropical Gyre	Dissecting microscope	Empty petri dishes.Blind spiked samples as control	-	Lusher, 2015 (Davison and Asch, 2011)
Lanternfish	Myctophum lychnobium	-	17	From off the Mariana Islands (Philippine sea)	Dissection	-	-	Ivar do Sul and Costa, 2014 (J. E. Van Noord, 2013)
Andre's lanternfish	Centrobranchus andreae	-	5	From off the Mariana Islands (Philippine sea)	Dissection	-	-	Ivar do Sul and Costa, 2014 (Van Noord, 2013)
Evermann's lantern fish	Symbolophorus evermanni	-	14	From off the Mariana Islands (Philippine sea)	Dissection	-	-	Ivar do Sul and Costa, 2014 (Van Noord, 2013)
Pemecoe catfish	Sciades herzbergii	0.25 items/individual (11 positives)	62	From a tropical estuary of the Brazilian Northeast	Binoculars	-	-	Lusher, 2015 (Possatto et al., 2011)
		0-0.08 items/individual (average on all)	57	Screening 2 areas in two tropical Brazilian estuaries	Stereoscopic microscope	-	Petri dishes and tweezers thoroughly cleaned with alcohol. Disposable gloves	Vendel et al., 2017
Hatchetfish	Sternoptyx diaphana	1 item in 1 positive individual	4	From North Pacific Subtropical Gyre	Dissecting microscope	Empty petri dishes.Blind spiked samples as control	-	Lusher, 2015 (Davison and Asch, 2011)
Pacific black dragon	Idiacanthus antrostomus	1 item in 1 positive individual	4	From North Pacific Subtropical Gyre	Dissecting microscope	Empty petri dishes.Blind spiked samples as control	-	Lusher, 2015 (Davison and Asch, 2011)
Thickback sole	Microchirus variegatus	1.58 (±0.8) items/individual (in 12 positives)	51	Comparison between pelagic and demersal fish from English Channel	Dissecting microscope +FTIR	-	Work surfaces thoroughly cleaned with alcohol, hands and forearms scrubbed. Gloves (nitrile), instruments cleaned after every specimen. Plastic zip lock bags for samples. All instruments and equipment checked under microscope prior use.	Lusher, 2015-Nerland et al., 2014 (Lusher et al., 2013)
Indopacific snaggletooth	Astronesthes indopacificus	1 items/individual (0.03 mg/individual)	7	From North Pacific Central Gyre	Dissecting microscope	-	-	Lusher, 2015-Nerland et al., 2014 (Boerger et al., 2010)
Red band fish	Cepola macrophthalma	2.15 (±2.0) items/individual (in 20 positives)	62	Comparison between pelagic and demersal fish from English Channel	Dissecting microscope +FTIR	-	Work surfaces thoroughly cleaned with alcohol, hands and forearms scrubbed. Gloves (nitrile), instruments cleaned after every specimen. Plastic zip lock bags for samples. All instruments and equipment checked under microscope prior use.	Lusher, 2015 (Lusher et al., 2013)
Twait shad	Alosa fallax	1 particle/1 individual	1	From off the coast of Portugal	Dissection under stereoscopic microscope + µ-FTIR	-	swift fish opening, Petri dish, latex gloves, glass and metal ware, cotton labcoats and clothing	Neves et al., 2015
Meagre	Argyrosomus regius	0.80 ± 0.8 items/individual (2 particles and 2 fibers/5 individuals - 3 positives)	5	From local Portugese fisheries at the markets of Caparica and Sesimbra	Dissection under stereoscopic microscope + µ-FTIR	-	Swift fish opening, Petri dish, latex gloves, glass and metal ware, cotton labcoats and clothing	Neves et al., 2015
		2.47 items/individual (average on 38 positive individuals)	51	Survey over 10 location in the Turkish territorial waters of the Mediterranean Sea	Digestion with 35% hydrogen peroxide + filtration (26 μm) + Stereomicroscope +FTIR	Control petri dish in dissecting chamber treated in the same way as the rest of the samples	All dissections performed inside an infant incubator custom modified to serve as a sealed dissecting chamber. Latex gloves, glass and metal ware, and cotton lab coats.	Güven et al., 2017
Blue runner	Caranx crysos	5 items/individual	1	Survey over 10 location in the Turkish territorial waters of the Mediterranean Sea	Digestion with 35% hydrogen peroxide + filtration (26 μm) + Stereomicroscope +FTIR	Control petri dish in dissecting chamber treated in the same way as the rest of the samples	All dissections performed inside an infant incubator custom modified to serve as a sealed dissecting chamber. Latex gloves, glass and metal ware, and cotton lab coats.	Güven et al., 2017
Pink dentex	Dentex gibbosus	1 item/individual (average in 4 positive individuals)	14	Survey over 10 location in the Turkish territorial waters of the Mediterranean Sea	Digestion with 35% hydrogen peroxide + filtration (26 μm) + Stereomicroscope +FTIR	Control petri dish in dissecting chamber treated in the same way as the rest of the samples	All dissections performed inside an infant incubator custom modified to serve as a sealed dissecting chamber. Latex gloves, glass and metal ware, and cotton lab coats.	Güven et al., 2017
Annular seabream	Diplodus annularis	2.86 items/individual (average in 33 positive individuals)	48	Survey over 10 location in the Turkish territorial waters of the Mediterranean Sea	Digestion with 35% hydrogen peroxide + filtration (26 μm) + Stereomicroscope +FTIR	Control petri dish in dissecting chamber treated in the same way as the rest of the samples	All dissections performed inside an infant incubator custom modified to serve as a sealed dissecting chamber. Latex gloves, glass and metal ware, and cotton lab coats.	Güven et al., 2017
Sand	Lithognathus mormyrus	1.88 items/individual (average in 16 positive individuals)	46	Survey over 10 location in the Turkish territorial waters of the Mediterranean Sea	Digestion with 35% hydrogen peroxide + filtration (26 μm) + Stereomicroscope +FTIR	Control petri dish in dissecting chamber treated in the same way as the rest of the samples	All dissections performed inside an infant incubator custom modified to serve as a sealed dissecting chamber. Latex gloves, glass and metal ware, and cotton lab coats.	Güven et al., 2017
Golden grey mullet	Liza aurata	7.47 items/individual (average in 17 positive individuals)	39	Survey over 10 location in the Turkish territorial waters of the Mediterranean Sea	Digestion with 35% hydrogen peroxide + filtration (26 μm) + Stereomicroscope +FTIR	Control petri dish in dissecting chamber treated in the same way as the rest of the samples	All dissections performed inside an infant incubator custom modified to serve as a sealed dissecting chamber. Latex gloves, glass and metal ware, and cotton lab coats.	Güven et al., 2017
Brown meagre	Sciaena umbra	3 items/individual	1	Survey over 10 location in the Turkish territorial waters of the Mediterranean Sea	Digestion with 35% hydrogen peroxide + filtration (26 μm) + Stereomicroscope +FTIR	Control petri dish in dissecting chamber treated in the same way as the rest of the samples	All dissections performed inside an infant incubator custom modified to serve as a sealed dissecting chamber. Latex gloves, glass and metal ware, and cotton lab coats.	Güven et al., 2017
Bogue	Boops boops	0.09 ± 0.3 items/individual (1 particle and 2 fibers/32 individuals - 3 positives)	32	From off the coast of Portugal (fish collected on board stern trawlers on 7 occasions)	Dissection under stereoscopic microscope + µ-FTIR	-	Swift fish opening, Petri dish, latex gloves, glass and metal ware, cotton labcoats and clothing	Neves et al., 2015
		3.75 (± 0.25) items/individual (195 positives)	337	From 4 locations around the Balearic Islands (Mediterranean Sea)	Dissection + stereomicroscope	Glass petri dishes left in laboratory as a control for microplastics for 24 hours (none found). 2 glass petri dishes placed at each side of the stereomicroscope and checked for microplastics before and after each sample (none found)	All work surfaces and manipulation instruments cleaned with alcohol. Hands and forearms scrubbed and 100% cotton lab coat worn.	Nadal et al., 2016
Atlantic pomfret	Brama brama	0.67 ± 1.2 items/individual (2 fibers/3 individuals -1 positive)	3	From local Portugese fisheries at the markets of Caparica and Sesimbra	Dissection under stereoscopic microscope + µ-FTIR	-	Swift fish opening, Petri dish, latex gloves, glass and metal ware, cotton labcoats and clothing	Neves et al., 2015
Large-eye dentex	Dentex macrophthalmus	1 fiber in 1 individual	1	From local Portugese fishery (markets of Caparica or Sesimbra)	Dissection under stereoscopic microscope + µ-FTIR	-	Swift fish opening, Petri dish, latex gloves, glass and metal ware, cotton labcoats and clothing	Neves et al., 2015
Angler	Lophius piscatorius	0.5 (mean) item/individual (1 fiber/2 individuals - 1 positive)	2	From local Portugese fisheries at the markets of Caparica and Sesimbra	Dissection under stereoscopic microscope + µ-FTIR	-	Swift fish opening, Petri dish, latex gloves, glass and metal ware, cotton labcoats and clothing	Neves et al., 2015
European hake	Merluccius merluccius	A) 0.29 ± 0.49 items/individual (2 fibers/7 individuals- 2 positives) B) 0.40 ± 0.89items/individual (2 fibers/5 individuals 1 positive).	A) 7; B) 5	A) From off the coast of Portugal (fish collected on board stern trawlers on 7 occasions). B) From local Portugese fisheries at the markets of Caparica and Sesimbra	Dissection under stereoscopic microscope + µ-FTIR	-	Swift fish opening, Petri dish, latex gloves, glass and metal ware, cotton labcoats and clothing	Neves et al., 2015
		1.1 items/individual (2 positives)	12	From Gulf of Cadiz	Visual observation under stereoscopic microscope + microplastic identification as mouldable items with consistent thickness and colour that do not break when pressed with forceps	1 Petri dish with few ml of distilled water next to working zone (no atmospheric contamination detected)	Special care during dissection, sorting and visualisation, cotton lab coats, material and surfaces cleaned with alcohol	Bellas et al., 2016
		1.33 ± 0.57 items/individual (all positive individuals)	3	From Central and North Adriatic Sea	Extraction with NaCl hypersaline solution filtration + digestion with 15% H2O2 + microscopy observation + FT-IR	-	Deionized water and hypersaline solution pre-filtered (0.45 μm); all materials cleaned with filtered deionized water and air dried. All sample processing performed in a clean air flow cabinet	Avio et al., 2015
Lesser spotted dogfish or Small-spotted catshark	Scyliorhinus canicula	1.20 ± 0.45 (highest mean among the 5 fishing areas ± SD) items/individual (11 positives)	72	From 3 areas of Mediterranean waters (Galician coast, Cantabrian coast, Gulf of Cadiz)	Visual observation under stereoscopic microscope + microplastic identification as mouldable items with consistent thickness and colour that do not break when pressed with forceps	1 Petri dish with few ml of distilled water next to working zone (no atmospheric contamination detected)	Special care during dissection, sorting and visualisation, cotton lab coats, material and surfaces cleaned with alcohol	Bellas et al., 2016
		A) 0.12 ± 0.33 (mean ± SD) microplastics/individual; 1 particle and 2 fibers/17 individuals. B) 0.40 ± 0.89 (mean ± SD) microplastics/individual; 3 fibers/3 individuals.	A) 2 contaminated fishes among 17 individuals. B) 2 contaminated fishes among 3 individuals	A) From off the coast of Portugal (fish collected on board stern trawlers on 7 occasions). B) From local Portugese fisheries at the markets of Caparica and Sesimbra	Dissection under stereoscopic microscope + µ-FTIR	-	Swift fish opening, Petri dish, latex gloves, glass and metal ware, cotton labcoats and clothing	Neves et al., 2015
		1 item in 1 individual out of 20	20	North Sea	Visual	-	-	Smith, 2018
Red mullet	Mullus barbatus	1.75 ± 1.14 (highest mean among the 5 fishing areas ± SD) items/individual; (24 positives)	128	From 5 areas of Mediterranean waters (Barcelona, Cartagena, Málaga, Mahón and Ciutadella)	Visual observation under stereoscopic microscope + microplastic identification as mouldable items with consistent thickness and colour that do not break when pressed with forceps	1 Petri dish with few ml of distilled water next to working zone (no atmospheric contamination detected)	Special care during dissection, sorting and visualisation, cotton lab coats, material and surfaces cleaned with alcohol	Bellas et al., 2016
		2.12 items/individual (average on 136 positive individuals)	207	Survey over 10 location in the Turkish territorial waters of the Mediterranean Sea	Digestion with 35% hydrogen peroxide + filtration (26 μm) + Stereomicroscope +FTIR	Control petri dish in dissecting chamber treated in the same way as the rest of the samples	All dissections performed inside an infant incubator custom modified to serve as a sealed dissecting chamber. Latex gloves, glass and metal ware, and cotton lab coats.	Güven et al., 2017
		1.57 ± 0.78 items/individual (average on 7 positive individuals)	11	From Central and North Adriatic Sea	Extraction with NaCl hypersaline solution filtration + digestion with 15% H2O2 + microscopy observation + FT-IR	-	Deionized water and hypersaline solution pre-filtered (0.45 μm); all materials cleaned with filtered deionized water and air dried. All sample processing performed in a clean air flow cabinet	Avio et al., 2015
Surmullet or Striped red mullet	Mullus surmuletus	A) 2 microplastics/1 individual; 2 fibers/1 individual. B) 1.66 ± 0.57 (mean ± SD) microplastics/individual; 5 fibers/3 individuals.	A) 1 fish collected and found to be contaminated. B) 3 contaminated fishes among 3 individuals	A) From off the coast of Portugal (fish collected on board stern trawlers on 7 occasions). B) From local Portugese fisheries at the markets of Caparica and Sesimbra	Dissection under stereoscopic microscope + µ-FTIR	-	swift fish opening, Petri dish, latex gloves, glass and metal ware, cotton labcoats and clothing	Neves et al., 2015
		1.82 items/individual (average on 33 positive indiivduals)	51	Survey over 10 location in the Turkish territorial waters of the Mediterranean Sea	Digestion with 35% hydrogen peroxide + filtration (26 μm) + Stereomicroscope +FTIR	Control petri dish in dissecting chamber treated in the same way as the rest of the samples	All dissections performed inside an infant incubator custom modified to serve as a sealed dissecting chamber. Latex gloves, glass and metal ware, and cotton lab coats.	Güven et al., 2017
Randall's threadfin bream	Nemipterus randalli	2.24 items/individual (average on 74 positive indiivduals)	135	Survey over 10 location in the Turkish territorial waters of the Mediterranean Sea	Digestion with 35% hydrogen peroxide + filtration (26 μm) + Stereomicroscope +FTIR	Control petri dish in dissecting chamber treated in the same way as the rest of the samples	All dissections performed inside an infant incubator custom modified to serve as a sealed dissecting chamber. Latex gloves, glass and metal ware, and cotton lab coats.	Güven et al., 2017
Axillary seabream	Pagellus acarne	1 fiber/1 individual.	1	From off the coast of Portugal	Dissection under stereoscopic microscope + µ-FTIR	-	Swift fish opening, Petri dish, latex gloves, glass and metal ware, cotton labcoats and clothing	Neves et al., 2015
		2.46 items/individual (average on 35 positive indiivduals)	52	Survey over 10 location in the Turkish territorial waters of the Mediterranean Sea	Digestion with 35% hydrogen peroxide + filtration (26 μm) + Stereomicroscope +FTIR	Control petri dish in dissecting chamber treated in the same way as the rest of the samples	All dissections performed inside an infant incubator custom modified to serve as a sealed dissecting chamber. Latex gloves, glass and metal ware, and cotton lab coats.	Güven et al., 2017
Common pandora	Pagellus erythrinus	1.21 items/individual (average on 28 positive indiivduals)	54	Survey over 10 location in the Turkish territorial waters of the Mediterranean Sea	Digestion with 35% hydrogen peroxide + filtration (26 μm) + Stereomicroscope +FTIR	Control petri dish in dissecting chamber treated in the same way as the rest of the samples	All dissections performed inside an infant incubator custom modified to serve as a sealed dissecting chamber. Latex gloves, glass and metal ware, and cotton lab coats.	Güven et al., 2017
Red porgy	Pagrus pagrus	1.86 items/individual (average on 7 positive indiivduals)	9	Survey over 10 location in the Turkish territorial waters of the Mediterranean Sea	Digestion with 35% hydrogen peroxide + filtration (26 μm) + Stereomicroscope +FTIR	Control petri dish in dissecting chamber treated in the same way as the rest of the samples	All dissections performed inside an infant incubator custom modified to serve as a sealed dissecting chamber. Latex gloves, glass and metal ware, and cotton lab coats.	Güven et al., 2017
Fourlined terapon	Pelates quadrilineatus	2.27 items/individual (average on 88 positive indiivduals)	135	Survey over 10 location in the Turkish territorial waters of the Mediterranean Sea	Digestion with 35% hydrogen peroxide + filtration (26 μm) + Stereomicroscope +FTIR	Control petri dish in dissecting chamber treated in the same way as the rest of the samples	All dissections performed inside an infant incubator custom modified to serve as a sealed dissecting chamber. Latex gloves, glass and metal ware, and cotton lab coats.	Güven et al., 2017
Bastard grunt	Pomadasys incisus	1.44 items/individual (average on 16 positive indiivduals)	29	Survey over 10 location in the Turkish territorial waters of the Mediterranean Sea	Digestion with 35% hydrogen peroxide + filtration (26 μm) + Stereomicroscope +FTIR	Control petri dish in dissecting chamber treated in the same way as the rest of the samples	All dissections performed inside an infant incubator custom modified to serve as a sealed dissecting chamber. Latex gloves, glass and metal ware, and cotton lab coats.	Güven et al., 2017
Comber	Serranus cabrilla	2.25 items/individual (average on 4 positive indiivduals)	6	Survey over 10 location in the Turkish territorial waters of the Mediterranean Sea	Digestion with 35% hydrogen peroxide + filtration (26 μm) + Stereomicroscope +FTIR	Control petri dish in dissecting chamber treated in the same way as the rest of the samples	All dissections performed inside an infant incubator custom modified to serve as a sealed dissecting chamber. Latex gloves, glass and metal ware, and cotton lab coats.	Güven et al., 2017
Dusky spinefoot	Siganus luridus	3.62 items/individual (average on 13 positive indiivduals)	15	Survey over 10 location in the Turkish territorial waters of the Mediterranean Sea	Digestion with 35% hydrogen peroxide + filtration (26 μm) + Stereomicroscope +FTIR	Control petri dish in dissecting chamber treated in the same way as the rest of the samples	All dissections performed inside an infant incubator custom modified to serve as a sealed dissecting chamber. Latex gloves, glass and metal ware, and cotton lab coats.	Güven et al., 2017
Gilthead seabream	Sparus aurata	2.00 items/individual (average on 48 positive indiivduals)	110	Survey over 10 location in the Turkish territorial waters of the Mediterranean Sea	Digestion with 35% hydrogen peroxide + filtration (26 μm) + Stereomicroscope +FTIR	Control petri dish in dissecting chamber treated in the same way as the rest of the samples	All dissections performed inside an infant incubator custom modified to serve as a sealed dissecting chamber. Latex gloves, glass and metal ware, and cotton lab coats.	Güven et al., 2017
Mediterranean starry ray	Raja asterias	0.57 ± 0.79 items/individual (4 fibers/7 individuals- 3 positives)	7	From local Portugese fisheries at the markets of Caparica and Sesimbra	Dissection under stereoscopic microscope + µ-FTIR	-	Swift fish opening, Petri dish, latex gloves, glass and metal ware, cotton labcoats and clothing	Neves et al., 2015
Chub mackerel	Scomber japonicus	0.57 ± 1.04 items/individual (14 particles and 6 fibers/35 individuals - 11 positives)	35	From off the coast of Portugal (fish collected on board stern trawlers on 7 occasions)	Dissection under stereoscopic microscope + µ-FTIR	-	Swift fish opening, Petri dish, latex gloves, glass and metal ware, cotton labcoats and clothing	Neves et al., 2015
		1 item in 1 individual (out of 30)	30	To establish the first baseline of microplastic contamination in fish from the South American Pacific coastrom, (Peru)	Gut content examined with dissecting microscope + FTIR-ATR	-	All tools thoroughly cleaned with ethanol and checked under the dissecting microscope	Ory et al., 2018
		9.40 items/individual (average on 5 positive indiivduals)	7	Survey over 10 location in the Turkish territorial waters of the Mediterranean Sea	Digestion with 35% hydrogen peroxide + filtration (26 μm) + Stereomicroscope +FTIR	Control petri dish in dissecting chamber treated in the same way as the rest of the samples	All dissections performed inside an infant incubator custom modified to serve as a sealed dissecting chamber. Latex gloves, glass and metal ware, and cotton lab coats.	Güven et al., 2017
Mediterranean horse mackerel	Trachurus mediterraneus	2.58 items/individual (average on 67 positive indiivduals)	98	Survey over 10 location in the Turkish territorial waters of the Mediterranean Sea	Digestion with 35% hydrogen peroxide + filtration (26 μm) + Stereomicroscope +FTIR	Control petri dish in dissecting chamber treated in the same way as the rest of the samples	All dissections performed inside an infant incubator custom modified to serve as a sealed dissecting chamber. Latex gloves, glass and metal ware, and cotton lab coats.	Güven et al., 2017
Blue jack mackerel	Trachurus picturatus	0.03 ± 0.18 items/individual (1 fiber/29 individuals - 1 positive)	29	From off the coast of Portugal (fish collected on board stern trawlers on 7 occasions)	Dissection under stereoscopic microscope + µ-FTIR	-	Swift fish opening, Petri dish, latex gloves, glass and metal ware, cotton labcoats and clothing	Neves et al., 2015
Tub gurnard	Trigla lucerna or Chelidonichthys lucerna	2.00 items/individual (average on 9 positive indiivduals)	24	Survey over 10 location in the Turkish territorial waters of the Mediterranean Sea	Digestion with 35% hydrogen peroxide + filtration (26 μm) + Stereomicroscope +FTIR	Control petri dish in dissecting chamber treated in the same way as the rest of the samples	All dissections performed inside an infant incubator custom modified to serve as a sealed dissecting chamber. Latex gloves, glass and metal ware, and cotton lab coats.	Güven et al., 2017
		1 item in 1 individual	3	From Central and North Adriatic Sea	Extraction with NaCl hypersaline solution filtration + digestion with 15% H2O2 + microscopy observation + FT-IR	-	Deionized water and hypersaline solution pre-filtered (0.45 μm); all materials cleaned with filtered deionized water and air dried. All sample processing performed in a clean air flow cabinet	Avio et al., 2015
Piper gurnard	Trigla lyra	0.26 ± 0.57 items/individual (1 particle and 7 fibers/31 individuals - 6 positives)	31	From off the coast of Portugal (fish collected on board stern trawlers on 7 occasions)	Dissection under stereoscopic microscope + µ-FTIR	-	Swift fish opening, Petri dish, latex gloves, glass and metal ware, cotton labcoats and clothing	Neves et al., 2015
Goldband goatfish	Upeneus moluccensis	1.75 items/individual (average on 8 positive indiivduals)	18	Survey over 10 location in the Turkish territorial waters of the Mediterranean Sea	Digestion with 35% hydrogen peroxide + filtration (26 μm) + Stereomicroscope +FTIR	Control petri dish in dissecting chamber treated in the same way as the rest of the samples	All dissections performed inside an infant incubator custom modified to serve as a sealed dissecting chamber. Latex gloves, glass and metal ware, and cotton lab coats.	Güven et al., 2017
Por's goatfish	Upeneus pori	1.69items/individual (average on 32 positive indiivduals)	78	Survey over 10 location in the Turkish territorial waters of the Mediterranean Sea	Digestion with 35% hydrogen peroxide + filtration (26 μm) + Stereomicroscope +FTIR	Control petri dish in dissecting chamber treated in the same way as the rest of the samples	All dissections performed inside an infant incubator custom modified to serve as a sealed dissecting chamber. Latex gloves, glass and metal ware, and cotton lab coats.	Güven et al., 2017
Four-spot megrim	Lepidorhombus boscii	1 particle or fiber/2 individuals (1 positive)	2	From off the coast of Portugal (fish collected on board stern trawlers on 7 occasions)	Dissection under stereoscopic microscope + µ-FTIR	-	Swift fish opening, Petri dish, latex gloves, glass and metal ware, cotton labcoats and clothing	Neves et al., 2015
Atlantic croaker	Micropogonias undulatus	0.87 items/individual (173 positives)	383	From 7 locations along Texas Gulf Coast	Stomach washed with distilled deionized water through filters (1000 µm, 243 µm, 118 µm, 53 µm) + separation into size populations and organic or inoganic + classification by form and color	Blanks at various points in the lab (negligible level of airborne contamination)	Stomach storage in glass vial and ethanol, filters and instruments examined for particle contamination under microscope, lab surfaces and tools desinfected, samples covered except under microscope	Peters et al., 2017
Southern kingfish	Menticirrhus americanus	0.57 items/individual (53 positives)	150	From 7 locations along Texas Gulf Coast	Stomach washed with distilled deionized water through filters (1000 µm, 243 µm, 118 µm, 53 µm) + separation into size populations and organic or inoganic + classification by form and color	Blanks at various points in the lab (negligible level of airborne contamination)	Stomach storage in glass vial and ethanol, filters and instruments examined for particle contamination under microscope, lab surfaces and tools desinfected, samples covered except under microscope	Peters et al., 2017
Atlantic spadefish	Chaetodipterus faber	1.38 items/individual (48 positives)	103	From 7 locations along Texas Gulf Coast	Stomach washed with distilled deionized water through filters (1000 µm, 243 µm, 118 µm, 53 µm) + separation into size populations and organic or inoganic + classification by form and color	Blanks at various points in the lab (negligible level of airborne contamination)	Stomach storage in glass vial and ethanol, filters and instruments examined for particle contamination under microscope, lab surfaces and tools desinfected, samples covered except under microscope	Peters et al., 2017
Sand trout or Sand weakfish	Cynoscion arenarius	0.79 items/individual (60 positives)	139	From 7 locations along Texas Gulf Coast	Stomach washed with distilled deionized water through filters (1000 µm, 243 µm, 118 µm, 53 µm) + separation into size populations and organic or inoganic + classification by form and color	Blanks at various points in the lab (negligible level of airborne contamination)	Stomach storage in glass vial and ethanol, filters and instruments examined for particle contamination under microscope, lab surfaces and tools desinfected, samples covered except under microscope	Peters et al., 2017
Pinfish	Lagodon rhomboides	0.96 items/individual (209 positives)	449	From 7 locations along Texas Gulf Coast	Stomach washed with distilled deionized water through filters (1000 µm, 243 µm, 118 µm, 53 µm) + separation into size populations and organic or inoganic + classification by form and color	Blanks at various points in the lab (negligible level of airborne contamination)	Stomach storage in glass vial and ethanol, filters and instruments examined for particle contamination under microscope, lab surfaces and tools desinfected, samples covered except under microscope	Peters et al., 2017
Grunt or Pigfish	Orthopristis chrysoptera	0.54 items/individual (42 positives)	157	From 7 locations along Texas Gulf Coast	Stomach washed with distilled deionized water through filters (1000 µm, 243 µm, 118 µm, 53 µm) + separation into size populations and organic or inoganic + classification by form and color	Blanks at various points in the lab (negligible level of airborne contamination)	Stomach storage in glass vial and ethanol, filters and instruments examined for particle contamination under microscope, lab surfaces and tools desinfected, samples covered except under microscope	Peters et al., 2017
Glacier lantern fish	Benthosema glaciale	1.8 items/individual (47 positives)	69	NorthWest Atlantic, fish specie abundant in this ocean, their vertical migration contributes to the transport of nutrients to the deep sea	Dissection (oesophagus till duodenum) +, KOH digestion + filtration( 0.7 µm) + filter rinsing with water + examination by stero microscope + polymer identification by µ-FTIR	Wet filter kept in borosilicate petri dish inside laminar flow	Equipment rinsed with MilliQ water, clothing of non-polymer nature, samples and filters under clean air laminar flow hood or covered in borosilicate petri dish	Wieczorek et al., 2018
Fin whale	Balaenoptera physalus	3653 items assumed/day (hypthotetic number based on seawater filtration rate at swimming speed combined with mean particle number/m³ in the sea in that area)	5	From 5 sites along the Italian coast	-	Blanks analysed for lab contamination and interference	-	Fossi et al., 2014
Basking shark	Cetorhinus maximus	13,110 items assumed/day (hypthotetic number based on seawater filtration rate combined with mean particle number/m³ in the sea in that area)	6	From 5 sites along the Italian coast	-	Blanks analysed for lab contamination and interference	-	Fossi et al., 2014
Brazilian sharpnose shark	Rhizoprionodon lalandii	2-6 items/individual (2 positives)	6	Species commercially important from fishing ports of Salvador city (from eastern coast of Brazil)	Stomach content sorted for plastic debris + classification by shape and color	-	-	Miranda and Freire de Carvalho-Souza , 2016
King mackerel	Scomberomorus cavalla	1-3 items/individual (5 positives)	8	Species commercially important from fishing ports of Salvador city (from eastern coast of Brazil)	Stomach content sorted for plastic debris + classification by shape and color	-	-	Miranda and Freire de Carvalho-Souza , 2016
Antarctic toothfish	Dissostichus mawsoni	2 items in 1 positive ndividual	10	Southeast Australian waters	Dissection + washed in petri dish + content passagethrough Tyler sieves (0.33, 1.00, 4.75 mm) + examination under dissecting microscope + polymer identification by FT-IR	-	Listing measure, such as laminar flow cabinet, sterilisation of equipment and workspace, dissecting microscope to complete visual inspection; but does not describe if they were applied in this study	Cannon et al., 2016
Humpback whale	Megaptera novaeangliae	6 itemss/individual	1	Stranded whale on a sandbank between Den Helder and the island Texel, the Netherlands	Passage in sieves (mesh size 1mm and 0.5 mm) + dissoution in 10% KOH + washing through sieves (300 µm, 120 µm) + FT-IR	-	-	Besseling et al., 2015
Common sole	Solea solea	1.64 (± 0.1) items/individual in 2015 1.73 (± 0.05) items/individual in 2014 506 positives)	533	From 60 sampling sites in central and northern Adriatic Sea in 2104 and 2015	Digestion (oesophagus, stomach and intestine) in 10% KOH + NaI + floating plastic particles collected and filtered through GF/A filters + particle counting under microscope + polymer identification by µFT-IR	-	-	Pellini et al., 2018

## Sheet: Molluscs
COMMON NAME	TAXONOMY	Level of microplastic contamination (sometimes average value)	Samples	Sampling rationale	Method	Control/blank	Cross-contamination prevention	References
Fingerprint oyster	Alectryonella plicatula	~6 (±1.5) items/g (all individuals contaminated)	18	Most commercially popular. From fishery market in China	Hydrogen peroxide treatment + Floatation and filtration with saline (NaCl) solution + microscope observation and m-FT-IR verification	One blank extraction group without tissue	Liquid (freshwater, salt water and hydrogen peroxide) filtered with 1mm filter paper prior to use. Containers and beakers rinsed three times with filtered water.Samples covered if not in use. Experimental procedures finished as soon as possible	Wesch et al., 2016 (Li J. et al., 2015)
Asian clam	Corbicula fluminea	0.3-4.9 items/g 0.4–5.0 items/individual (background contamination: 4.9–6.9%)	3 individuals collected at each site. Replicates of at least 10 living clams of similar sizes. For each sampling site, three replicates of 2–4 clams extracted and analyzed	Sampling areas and individual sampling sites located in urban and rural areas, impacted by different sources of pollutants, 21 sites in the Middle-Lower Yangtze River Basin, China.	Digestion with hydrogen peroxide + filtration + microscope observation and m-FT-IR verification	51 blank samples without water, sediment or clam tissue, performed simultaneously	Containers and sampling tools washed with tap water, filtered prior to use (pore size of filter was 0.45 μm). Tools sealed in an aluminum foil bag and kept clean before using. During sampling procedure, tools prewashed using water in situ.	Su L. et al., 2018
Asian hard clam	Meretrix lusoria	~4 (±1.5)items/g (all individuals contaminated)	18	Most commercially popular. From fishery market in China	Hydrogen peroxide treatment + Floatation and filtration with saline (NaCl) solution + microscope observation and m-FT-IR verification	One blank extraction group without tissue	Liquid (freshwater, salt water and hydrogen peroxide) filtered with 1mm filter paper prior to use. Containers and beakers rinsed three times with filtered water.Samples covered if not in use. Experimental procedures finished as soon as possible	Wesch et al., 2016 (Li J. et al., 2015)
Black clam	Cyclina sinensis	~4 (±1.5)items/g (all individuals contaminated)	30	Most commercially popular. From fishery market in China	Hydrogen peroxide treatment + Floatation and filtration with saline (NaCl) solution + microscope observation and m-FT-IR verification	One blank extraction group without tissue	Liquid (freshwater, salt water and hydrogen peroxide) filtered with 1mm filter paper prior to use. Containers and beakers rinsed three times with filtered water.Samples covered if not in use. Experimental procedures finished as soon as possible	Wesch et al., 2016 (Li J. et al., 2015)
Chinese razor clam	Sinonovacula constricta	~2 (±1.5)items/g (all individuals contaminated)	6	Most commercially popular. From fishery market in China	Hydrogen peroxide treatment + Floatation and filtration with saline (NaCl) solution + microscope observation and m-FT-IR verification	One blank extraction group without tissue	Liquid (freshwater, salt water and hydrogen peroxide) filtered with 1mm filter paper prior to use. Containers and beakers rinsed three times with filtered water.Samples covered if not in use. Experimental procedures finished as soon as possible	Wesch et al., 2016 (Li J. et al., 2015)
Blood clam	Tegillarca granosa	~4 (±1.5) items/g (all individuals contaminated)	18	Most commercially popular. From fishery market in China	Hydrogen peroxide treatment + Floatation and filtration with saline (NaCl) solution + microscope observation and m-FT-IR verification	One blank extraction group without tissue	Liquid (freshwater, salt water and hydrogen peroxide) filtered with 1mm filter paper prior to use. Containers and beakers rinsed three times with filtered water.Samples covered if not in use. Experimental procedures finished as soon as possible	Wesch et al., 2016 (Li J. et al., 2015)
Clam	Venerupis philippinarum, syn. Ruditapes phlippinarum	~2.5 (±1.5) items/g (all individuals contaminated)	24	Most commercially popular. From fishery market in China	Hydrogen peroxide treatment + Floatation and filtration with saline (NaCl) solution + microscope observation and m-FT-IR verification	One blank extraction group without tissue	Liquid (freshwater, salt water and hydrogen peroxide) filtered with 1mm filter paper prior to use. Containers and beakers rinsed three times with filtered water.Samples covered if not in use. Experimental procedures finished as soon as possible	Wesch et al., 2016 (Li J. et al., 2015)
Venus clam	Amiantis umbonella or Callista umbonell	6.9 (±5.4) items/individual	30	From Persian Gulf coast (Iran)	Digestion with 30% H2O2 + filtration (25 μm + 0.45 μm) + dissection microscope + stereomicroscope + scanning electron microscope with energy dispersive X-ray analyser to identify morphology + FT-IR	5 blank samples to assess lab contamination	Lab equipment and glass vessels rinsed twice with double distilled water and covered with aluminum foil. Laboratory coats, cotton clothing and gloves. Sieves covered. Samples wrapped in aluminum foil. All work surfaces cleaned with alcohol, hands and forearms scrubbed.	Naji et al., 2018
Girdled horn shell	Cerithidea cingulata	3.7(±0.4) items/individual	24	From Persian Gulf coast (Iran)	Digestion with 30% H2O2 + filtration (25 μm + 0.45 μm) + dissection microscope + stereomicroscope + scanning electron microscope with energy dispersive X-ray analyser to identify morphology + FT-IR	5 blank samples to assess lab contamination	Lab equipment and glass vessels rinsed twice with double distilled water and covered with aluminum foil. Laboratory coats, cotton clothing and gloves. Sieves covered. Samples wrapped in aluminum foil. All work surfaces cleaned with alcohol, hands and forearms scrubbed.	Naji et al., 2018
Carinate rock shell	Thais mutabilis orIndothais lacera	17.5(±9.8) items/individual	6	From Persian Gulf coast (Iran)	Digestion with 30% H2O2 + filtration (25 μm + 0.45 μm) + dissection microscope + stereomicroscope + scanning electron microscope with energy dispersive X-ray analyser to identify morphology + FT-IR	6 blank samples to assess lab contamination	Lab equipment and glass vessels rinsed twice with double distilled water and covered with aluminum foil. Laboratory coats, cotton clothing and gloves. Sieves covered. Samples wrapped in aluminum foil. All work surfaces cleaned with alcohol, hands and forearms scrubbed.	Naji et al., 2018
	Amiantis purpuratus	7.1 (±4.6) items/individual	30	From Persian Gulf coast (Iran)	Digestion with 30% H2O2 + filtration (25 μm + 0.45 μm) + dissection microscope + stereomicroscope + scanning electron microscope with energy dispersive X-ray analyser to identify morphology + FT-IR	7 blank samples to assess lab contamination	Lab equipment and glass vessels rinsed twice with double distilled water and covered with aluminum foil. Laboratory coats, cotton clothing and gloves. Sieves covered. Samples wrapped in aluminum foil. All work surfaces cleaned with alcohol, hands and forearms scrubbed.	Naji et al., 2018
Rayed pearl oyster	Pinctada radiata	3.9 (±1.3) items/individual	33	From Persian Gulf coast (Iran)	Digestion with 30% H2O2 + filtration (25 μm + 0.45 μm) + dissection microscope + stereomicroscope + scanning electron microscope with energy dispersive X-ray analyser to identify morphology + FT-IR	8 blank samples to assess lab contamination	Lab equipment and glass vessels rinsed twice with double distilled water and covered with aluminum foil. Laboratory coats, cotton clothing and gloves. Sieves covered. Samples wrapped in aluminum foil. All work surfaces cleaned with alcohol, hands and forearms scrubbed.	Naji et al., 2018
Brown mussel	Perna perna	-	30	From estuary of Santos (Southeastern Brazil)	Digestion with HNO3 + filtration (0.7 μm) + polarized light microscope	No blanks, so: Fibers discarded from counts and filter fibers analysed with polarized light microscope	All material and equipment cleaned with distilled wate. Fume hood. 100% cotton lab coat. Glass flasks and other apparatus	Santana et al., 2016
		0.35 items/g (consumption mussels) 0.26 items/g (wild musselsfrom groyne) 0.51 items/g wild mussels from quayside)	5 mussels per location (6 for wild, plus 3 brands at market for commercial)	From Belgian department stores and Belgian groynes and quaysides	Acid digestion with HNO3:HClO4 (4:1 v:v). + filtration + stereo microscope observation	3 blank (=without mussel tissue) analyses per location	Samples stored in aluminium foil in the freezer prior analysis. Solutions filtered (10–20 ml). Laboratory glassware cleaned with acetone and filtered type 1 water. Mussel body rinsed with filtered type 1 water to remove the intervalve water. Digestion solution covered with a clock glass to avoid contamination by air. No synthetic clothing allowed in the lab.	De Witte et al.,2014
Mediterranean mussel	Mytilus Galloprovincialis	~2.5 (±1.5) items/g (all individuals contaminated)	18	Most commercially popular. From fishery market in China	Hydrogen peroxide treatment + Floatation and filtration with saline (NaCl) solution + microscope observation and m-FT-IR verification	One blank extraction group without tissue	Liquid (freshwater, salt water and hydrogen peroxide) filtered with 1mm filter paper prior to use. Containers and beakers rinsed three times with filtered water.Samples covered if not in use. Experimental procedures finished as soon as possible	Wesch et al., 2016 (Li J. et al., 2015)
		0.35 items/g (consumption mussels) 0.26 items/g (wild musselsfrom groyne) 0.51 items/g wild mussels from quayside)	5 mussels per location (6 for wild, plus 3 brands at market for commercial)	From Belgian department stores and Belgian groynes and quaysides	Acid digestion + filtration + stereo microscope observation	3 blank (=without mussel tissue) analyses per location	Samples stored in aluminium foil in the freezer prior analysis. Solutions filtered (10–20 ml). Laboratory glassware cleaned with acetone and filtered type 1 water. Mussel body rinsed with filtered type 1 water to remove the intervalve water. Digestion solution covered with a clock glass to avoid contamination by air. No synthetic clothing allowed in the lab.	De Witte et al.,2014
		3.6-12.4 items/individual (4.4-11.4 items/g)	10	3 commercial stocks of mussels from local markets (provenience: central Adriatic Coast; Ligurian Sea Coast, North East Sardinia, Tyrrhenian Sea), + 1 stock from natural rocky bottom in Tuscany (central Tyrrhenian Sea)	Digestion with H2O2 30% + filtration (0.45 μm) + stereomicroscopy	Filters (n = 3) on glass Petri dish exposed to laboratory air. Blank tests	Glass materials and cotton dresses	Renzi et al., 2018
		0.18±0.14 items/ g (all positive, wild, Acid mix) 0.12±0.04 items/ g (all positive, wild, HNO3) 0.06±0.13 items/ g (France, commercial, Acid mix) 0.32±0.22 items/ g (The Netherlands commercial, Acid mix)	300 (wild) , 75( 25 per location, commercial)	Wild from Po estuary (Italy), Tagus estuary (Portugal), Ebro estuary (Spain); commercial from France, Denmark, and The Netherlands	Comparison of 2 destruction methods: Acid mix: HNO3:HClO4 (4:1 v:v) + filtration + stereo microscope; Nitric acid: 69% nitric acid + filtration (5 µm) + microscope	Blank samples without mussels (acid mix: 3 blanks every 5 mussels; nitric acid: 3 blanks every 12 mussels; average 1.2 fibres)	Acid mix: Glassware cleaned with acetone and filtered type 1 ultrapure water. Solutions covered with clock glass. Nitric acid: 100% cotton lab coat. All equipments rinsed with filtered deionised water, all samples processing performed in a clean laminar flow cabinet.Samples covered with clock glass	Vandermeersch et al., 2015
Blue Mussels	Mytilus edulis	0.25±0.26 items/ g (Italy) 0.04±0.09 items/ g (Spain)	50 ( 25 per location, commercial)	From Italy, Spain	destruction with HNO3:HClO4 (4:1 v:v) + filtration + stereo microscope	Blank samples without mussels (3 blanks every 5 mussels; average 1.2 fibres)	Acid mix: Glassware cleaned with acetone and filtered type 1 ultrapure water. Solutions covered with clock glass.	Vandermeersch et al., 2015
		0.36 (±0.07) items/g	36	Samples from a mussel farm in Germany and originated from the North Sea	Acid digestion + filtration (0.8 and 5 μm membrane filter) + microscope observation + micro-Raman spectrometer analysis	Procedural blanks (i.e. samples containing no tissue) included in every acid destruction	100% cotton lab coat, equipment rinsed 3 times with filtered deionised water (0.8 μm membrane filter) before use and all sample processing performed in a clean laminar flow cabinet.	Luscher A., 2015-Li et al, 2016-Wesch et al., 2016 (Van Cauwenberghe and Janssen, 2014)
		0.35 items/g (consumption mussels) 0.26 items/g (wild musselsfrom groyne) 0.51 items/g wild mussels from quayside)	5 mussels per location (6 for wild, plus 3 brands at market for commercial) from Belgian department stores and Belgian groynes and quaysides	-	Acid digestion with nitric acid + filtration(5 μm) + stereo microscope observation	3 blank (=without mussel tissue) analyses per location	Samples stored in aluminium foil in the freezer prior analysis. Solutions filtered (10–20 ml). Laboratory glassware cleaned with acetone and filtered type 1 water. Mussel body rinsed with filtered type 1 water to remove the intervalve water. Digestion solution covered with a clock glass to avoid contamination by air. No synthetic clothing allowed in the lab.	Luscher A., 2015-Li et al, 2016-Wesch et al., 2016 (De Witte et al.,2014)
		First analysis: 170 (wild) -375 (culture) fibers/5 mussels Second analysis: average number per observed to be ∼126 items/wild mussel from McCormack’s Beach, ∼106 items/wild mussel from Rainbow Haven Beach, and ∼178 items/farmed mussel	10 wild mussels + 10 cultured mussels for first analysis, 15 wild mussels + 15 cultured mussels for second analysis	Comparison of aquaculture and wild habitat. Mussels from an aquaculture site (off the west coast of Newfoundland and Labrador) and two protected beaches along Nova Scotia’s Eastern Shore, on the Atlantic coast of Canada	Dissection + digestion with H2O2 + separation via flotation with concentrated saline solution of NaCl in H2O + filtration ( 0.8 μm) + microscopic observation	Control samples to test extraction efficiency	New and unopened bags and petri dishes. All containers and beakers rinsed with distilled water prior use. Samples kept covered when possible	Wesch et al., 2016 (Mathalon and Hill, 2014)
		0-10 items/ individual (average 0.2 ± 0.3 items/g ) (all contaminated)		Comparisdon of locations along French–Belgian–Dutch coastline	clearance + acidi digestion with 69% nitric acid + filtration (5 μm) + microscopic observation + Raman spectroscopy	Blank extractions	Filtered solutions	Wesch et al, 2016 (Van Cauwenberghe et al., 2015)
		5-19 items/ individual	23	North Sea	Digestion with HNO3 and H2O2 + extraction based on density separation + filtration ( 0.7 μm) microscope observation	One blank per 3 sample analyses to correct for background contamination	All equipment rinsed with MilliQ® water before use. Samples, subsamples and filters covered. Glassware was used where possible	Karlsson et al., 2017
		3.4 ± 0.48 items/ individual	62	From Scottish commercial suppliers and deployed in cages in the estuary of the Forth River, Edinburgh, UK, in Port Edgar	enzymatic digestion with Corolase® 7089 + filtration (0.8 μm) + dissection microscope + FT-IR	Airborne fibre contamination: 1 Milli-Q water control sample (100 ml) . Procedural blanks (taken into account in calculations)	Samples covered, vials capped with aluminium, cotton lab coats, equipment rinsed with Milli-Q water, and glassware acid-washed	Catarino et al., 2018
		Coastal mussel tissue: 1.1 to 6.4 items/individual (0.7 to 2.9 items/g); supermarket products: live mussels: 0.9 items/g, processed mussels: 1.4 items/g; seawater: 3.5 ± 2.0 items/L ; 50% of randomly selected particles confirmed as microplastic, 37% rayon or cotton, ~10% cellulose (all mussel contaminated)	162	Mussels from 8 sites along UK coasts and 8 UK supermarkets (farmed, live and processed mussels), 6 replicates from each	tissue extraction using 30% H2O2, incubation at 65°C in oscillator at 80 rpm for 24h, then room temperature for 24-48h; density separation of particles and debris in concentrated saline solution, overlying water filtered on 5 µm cellulose nitrate membrane filter, filter observed under stero microscope; particle identity confirmed by µFT-IR	airborne contamination: blank extraction without tissue, 6 replicates: 0.67 ± 0.75 (mean ± SD) item per filter compared to 5.70 and 8.63 items/filter for supermarket and coastal mussel tissues, respectively	water and H2O2 filtered with 1 µm filter paper, apparatus rinsed 3 times with filtered water; no description of laminar flow nor special clothing precautions	Li et al., 2018
Blue mussel, Mediterranean mussel, bay mussel	Mytilus spp (M. edulis, M. galloprovincialis, M. trossulus)	3.2 ± 0.52 tems/ individual	36	From various locations along Scottish coast	enzymatic digestion with Corolase® 7089 + filtration (0.8 μm) + dissection microscope + FT-IR	Airborne fibre contamination: 1 Milli-Q water control sample (100 ml) . Procedural blanks (taken into account in calculations)	Samples covered, vials capped with aluminium, cotton lab coats, equipment rinsed with Milli-Q water, and glassware acid-washed	Catarino et al., 2018
Northern horsemussel	Modiolus modiolus	3.5 ± 1.29 tems/ individual	6	From various locations along Scottish coast	enzymatic digestion with Corolase® 7089 + filtration (0.8 μm) + dissection microscope + FT-IR	Airborne fibre contamination: 1 Milli-Q water control sample (100 ml) . Procedural blanks (taken into account in calculations)	Samples covered, vials capped with aluminium, cotton lab coats, equipment rinsed with Milli-Q water, and glassware acid-washed	Catarino et al., 2018
Pacific oyster	Crassostrea gigas	0.47 (±0.16) items/g	11	Samples from a supermarket and originated from Brittany, France	acid digestion with concentrated HNO3 + filtration (0.8 and 5 μm membrane filter) + microscope observation + micro-Raman spectrometer analysis	Procedural blanks (i.e. samples containing no tissue) included in every acid destruction	100% cotton lab coat, equipment rinsed 3 times with filtered deionised water (0.8 μm membrane filter) before use and all sample processing performed in a clean laminar flow cabinet.	Luscher A., 2015-Nerland et al., 2014-Wesch et al., 2016 (Van Cauwenberghe and Janssen, 2014)
		0.6 ±0.9 items/individual (4 positives)	12	Comparison of data on the 2 sides of Pacific. From USA	KOH extraction +microscopic abservation	-	-	Rochman et al., 2015
Scallop	Patinopecten yessoensis	~2.5 (±1.5) items/g (all individuals contaminated)	6	Most commercially popular. From fishery market in China	Hydrogen peroxide treatment + Floatation and filtration with saline (NaCl) solution + microscope observation and m-FT-IR verification	One blank extraction group without tissue	Liquid (freshwater, salt water and hydrogen peroxide) filtered with 1mm filter paper prior to use. Containers and beakers rinsed three times with filtered water.Samples covered if not in use. Experimental procedures finished as soon as possible	Wesch et al., 2016 (Li J. et al., 2015)
Half-crenated ark	Scapharca subcrenata	~10.5 (±1.5) items/g (all individuals contaminated)	6	Most commercially popular. From fishery market in China	Hydrogen peroxide treatment + Floatation and filtration with saline (NaCl) solution + microscope observation and m-FT-IR verification	One blank extraction group without tissue	Liquid (freshwater, salt water and hydrogen peroxide) filtered with 1mm filter paper prior to use. Containers and beakers rinsed three times with filtered water.Samples covered if not in use. Experimental procedures finished as soon as possible	Wesch et al., 2016 (Li J. et al., 2015)
Common periwinkle	Littorina littorea	0-6 items/ individual	29	Screen a range of invertebrate species from North Sea, for future monitoring	Digestion + microscope observation	One blank per 3 sample analyses to correct for background contamination	All equipment rinsed with MilliQ® water before use. Samples, subsamples and filters covered. Glassware was used where possible	Karlsson et al., 2017
Common limpet	Patella vulgata	0-1 items/ individual	11	Screen a range of invertebrate species from North Sea, for future monitoring	Digestion + microscope observation	One blank per 3 sample analyses to correct for background contamination	All equipment rinsed with MilliQ® water before use. Samples, subsamples and filters covered. Glassware was used where possible	Karlsson et al., 2017
Tower snails	Turritellidae sp.	0-4 items/ individual	10	Screen a range of invertebrate species from North Sea, for future monitoring	Digestion + microscope observation	One blank per 3 sample analyses to correct for background contamination	All equipment rinsed with MilliQ® water before use. Samples, subsamples and filters covered. Glassware was used where possible	Karlsson et al., 2017
Humbolt squid	Dosidicus gigas	max. 11 items/idividual	32	Stranded specimens on Vancouver Island	Sieving of stomach content (1mm2) + morphological evaluation	-	-	Lusher, 2015 (Braid et al., 2012).

## Sheet: Crustaceans
COMMON NAME	TAXONOMY	Level of microplastic contamination (sometimes average value)	Samples	Location and rationale	Method	Control/blank	Cross-contamination prevention	References
Japanese shore crab	Hemigrapsus sanguineus	0-5 items/ individual	9	Screen a range of invertebrate speciesfrom the North Sea for future monitoring	Digestion + microscope observation	One blank per 3 sample analyses to correct for background contamination	All equipment rinsed with MilliQ® water before use. Samples, subsamples and filters covered. Glassware was used where possible	Karlsson et al., 2017
Chinese mitten crab	Eriocheir sinensis	-	302	From Baltic coastal waters (Poland) and Tagus Estuary (Portugal)	Microscopy	-	-	Wójcik-Fudalewska et al., 2016
Brown shrimp	Crangon crangon	1.15 fibres/g	-	From Belgian part of North Sea	Acid digestion with HN03:HCI04 (4:1 v:v). + filtration (15 μm) + microscope observation	-	-	Luscher A., 2015 (Devriese et al.,2014)
		0.68 ± 0.55 items/g (1.23 ± 0.99 items/individual) (in 104 positives)	165	Spatio-temporal patterns of microplastics contamination from coastal waters of the Southern North Sea and Channel area (BE, UK, FR and NL)	Acid digestion + filtration (10–20 mm)+ stereo microscope observation	3 blanks without tissue	Clean-air cabinet	Wesch et al., 2016 (Devriese et al., 2015)
Green tiger prawn or grooved tiger prawn	Penaeus semisulcatus	7.8 items/individual (sum of muscle and exoskeleton - average on all individuals)	12	From 5 sites in coastal waters of Persian Gulf	Digestion with 35% H2O2 and 4% KOH, plus 68% HClO4 and 65% HNO3 (plus sodium iodide for digestion of gastrointestinal tract) + filtration + binocular microscope + high vacuum SEM/EDS	-	-	Abbasi et al., 2018
Pelagic gooseneck barnacle + Pacific Gooseneck Barnacle + barnacle	Lepas anatifera+Lepas pacifica + Lepas spp.	1–30 items/ individual (in 128 positives)	385	From North Pacific Subtropical Gyre	Dissecting microscope	-	Each barnacle dissected in a unique, clean petri dish with scalpel rinsed with deionized water	Luscher A., 2015-Nerland et al., 2014-Wesch et al., 2016 (Goldstein and Goodwin, 2013)
Langoustine or Norway lobster	Nephrops norvegicus	-	120	Areas representative for the commercial market in the Clyde Sea (Scotland)	Scanning electron microscope + Raman spectroscopy	Controls for Raman tests	-	Luscher A., 2015-Nerland et al., 2014-Goldstein​and Goodwin, 2013-Desforges et al., 2015 (Murray and Cowie, 2011)
		0-0.66 mg/ individual (975 positive individuals)	1450	Comparison of areasf rom Clyde Sea, North Minch and North Sea (Scotland)	Microscope observation + FT-IR spectrometry	-	-	Welden and Cowie, 2016a
North pacific krill	Euphausia pacifica	1 item/17 individuals	413	Selected for large size, importance in food webs, and as filter feeders. Location (Northeast Pacific Ocean) represents 4 major oceanographic areas of coastal British Columbia	Acid digestion with Nitric acid + dissection microscope	Procedural blanks	Covered samples	Wesch et al., 2016 (Desforges et al., 2015)

## Sheet: Turtles
COMMON NAME	TAXONOMY	Level of microplastic contamination (sometimes average value)	Samples	Location and rationale	Method	Control/blank	Cross-contamination prevention	References
Green sea turtle	Chelonia mydas	11 items/individual	24	From Rio Grande do Sul, Brazil	-	-	-	Lusher, 2015 (Tourinho et al.,2010).
		Macroplastics: 13 items/individual (debris size: 0.5-3.0 cm up to sections of bags >15.0 cm); microplastics: unknown. 56 contaminated turtles	62	From Rio de la Plata (Argentina-Uruguay)	-	-	-	González Carman et al., 2014
		Micro- and macroplastics: 10 items/individual (item size: 0-5 cm, 9 positives)	20	From Brazilian coast	Washing (gastrointestinal tract) + visual inspection in petri dish	-	-	da Silva Mendes et al., 2015
Loggerhead sea turtle	Caretta caretta	Micro- and macroplastics: 5 items/individual (items size: <1-16.0 cm- 13 positives)	54	From Adriatic Sea	-	-	-	Lazar and Gračan , 2011
		Plastic debris are <0.3% of total gut content (number and size not provided)	35 % of captured turtles are contaminated	From Central North Pacific Ocean	-	-	-	Parker et al., 2005
		Macroplastics: 0.5-16 cm length plastic debris representing 91.7% of ingested marine litter (proportion of microplastic unknown), 441 items/22 turtles ranging from 1 to 286 items/turtle	22	From North Tyrrhenian Sea and along Tuscany coast	Oesophagus, stomach and intestine analysed separately, content drained using a sieve of 1 mm mesh size + rinsed with water + sorted under stereomicroscope	-	-	Campani et al., 2013
		Macroplastic (microplastic proportion unknown): 255 items /17 individuals	121	From Western Mediterranean basin (Sardinian area)	Excreta, oesophagus, stomach, intestine content drained using a sieve of 1 mm mesh size + rinsed with water + sorted under stereomicroscope	-	-	Camedda et al., 2014
		Macroplastics in 38 positive individuals: 39.5 (mean) plastic debris/individual, debris size: 1.3 - 9.86 cm (microplastic contamination unknown)	74	From South-West Indian Ocean (between 2007 and 2013)	For living turtles: feces were collected and sieved (0.5 mm); for dead turtles: gut dissection	-	-	Hoarau et al., 2014

## Sheet: Fresh water fish
COMMON NAME	TAXONOMY	Level of microplastic contamination (sometimes average value)	Samples	Location and rationale	Method	Control/blank	Cross-contamination prevention	References
Brown trout	Salmo trutta	122 items/42 individuals	62	Swedish west coas	Proteins denaturation + enzyme degradation + filtration (1.2 μm) + microscope observation	One blank per 3 sample analyses to correct for background contamination	All equipment rinsed with MilliQ® water before use. Samples, subsamples and filters covered. Glassware was used where possible	Karlsson et al., 2017
Wild gudgeons	Gobio gobio	-	186	From French rivers	Dissecting microscope	-	Dissection tools cleaned using 1.2 µm filtered ultra-pure water and observed under a dissecting microscope to confirm lack of microplastic	Sanchez et al., 2014

## Sheet: Birds
COMMON NAME	TAXONOMY	Level of microplastic contamination (sometimes average value)	Samples	Location and rationale	Method	Control/blank	Cross-contamination prevention	References
Grey-backed thrush	Turdus hortulorum	10.6±6.4 items/individual (average on a pool of 17 birds, including non edible species)	1	From Shanghai, China	For stomach: NaI digestion + filtration (20-μm) + stereomicroscope + identification with melting test For intestine: KOH digestion + filtration + NaI sonication of filters + stereomicroscope + identification with melting test	Three blanks run by sucking air through three nylon filters in the chemical hood.	Milli-Q water and reagents filtered through Whatman GF/F filters prior to use. Work surfaces cleaned with 100% filtered alcohol, and hands and forearms scrubbed. Gloves (nitrile) and lab coats . Instruments cleaned with filtered Milli-Q water. Chemical laminar hood. Nylon membrane filters (20 μm, NY2004700, Millipore) and glassware checked under a stereo-microscope prior to use	Zhao et al., 2016
Eyebrowed thrush	Turdus obscurus	10.6±6.4 items/individual (average on a pool of 17 birds, including non edible species)	1	From Shanghai, China	For stomach: NaI digestion + filtration (20-μm) + stereomicroscope + identification with melting test For intestine: KOH digestion + filtration + NaI sonication of filters + stereomicroscope + identification with melting test	Three blanks run by sucking air through three nylon filters in the chemical hood.	Milli-Q water and reagents filtered through Whatman GF/F filters prior to use. Work surfaces cleaned with 100% filtered alcohol, and hands and forearms scrubbed. Gloves (nitrile) and lab coats . Instruments cleaned with filtered Milli-Q water. Chemical laminar hood. Nylon membrane filters (20 μm, NY2004700, Millipore) and glassware checked under a stereo-microscope prior to use	Zhao et al., 2016
Chicken	Gallus gallus domesticus	10.2 ± 13.8 items/chicken gizzard (chicken feces: 129.8 ± 82.3 items/g)	5	Comparison of ten Mexican home gardens	Separation by flotation + stereo microscope	-	-	Huerta Lwanga et al. 2017

## Sheet: Fed with MP in lab
CATEGORY	COMMON NAME	TAXONOMY	Level of microplastic contamination (sometimes average value)	Samples	Sampling rationale	Method	Control/blank	Cross-contamination prevention	References
	Clam	Atactodea striata	-	30 individuals for each replicate (10 indivduals per type of experiment)	-	Feeding + acid digestion + filtration (1.6 μm) + microscope counting	one group fed only with algae	-	Xu et al., 2017
	Bay mussel	Mytilus trossulus	-	6 replicates per type of experiment (3)	-	Feeding + video-endoscopy and using an electronic particle counter	-	-	Luscher A., 2015 (Ward et al., 2003)
	Blue Mussels	Mytilus edulis	-	5 replicates per type of experiment (3)	-	Feeding + video-endoscopy and using an electronic particle counter	-	-	Luscher A., 2015 (Ward et al., 2003)
			-	6 per 3 or 4 replicates per aquarium (8)	-	Dissection under a microscope weighing of faeces and pseudofaeces after filtration (diameter 47 mm)	One experiment withour nanoplastics added	-	Luscher A., 2015 (Wegner et al., 2012)
			-	18 mussels (9 + for blanks) per experiment (6 exposure times) chosen from a batch of 500 in total	-	Polarized light microscopy	Blanks per each exposure time	-	Luscher A., 2015 (von Moos et al., 2012)
			-	-	-	light- (fluorescence/epipolarisation) and electronmicroscopic techniques for direct imaging of reflection of microplastic materials	-	-	Luscher A., 2015 (Köhler , 2010)
			-	24	-	eye observation	-	-	Luscher A., 2015 (Farrell and Nelson, 2013)
			-	-	Site free from point sources of chemical contamination	Histological techniques	Control treatment without plastic exposure	-	Luscher A., 2015 (Browne et al., 2008)
			-	-	-	Count of spheres in faeces and pseudofaeces by hemocytometer	yes	-	Luscher A., 2015 (Ward and Tagart, 1989)
			-	12 + 15 + 2 for blanks	-	Dissection + digestion + spectrophotometric analysis of digestive glands and faeces	Individuals not exposed	-	Luscher A., 2015 (Ward and Kach, 2009)
			-	-	-	Chemical digestion with 69% nitric acid + microscopic analysis	-	Materials used for sampling, extraction and analysis cleaned with filtered deionised water (0.8 μm)	Luscher A., 2015 (Claessens et al., 2013)
			~33-40 items in different organs/ individual (retention) ~38-63 items items in different organs/ individual (accumulation)	126	From a fishery farm area in Zhoushan, Zhejiang, East China Sea	Dissection + digestion + separation via flotation + filtration (5 μm) + microscopic observation	Blank extraction group without tissue	Samples covered with aluminum foil.All containers and beakers rinsed three times with filter water before use	Kolandhasamy et al., 2018
	Eastern oyster	Crassostrea virginica	-	12 + 15 + 2 for blanks	-	Dissection + digestion + spectrophotometric analysis of digestive glands and faeces	Individuals not exposed	-	Luscher A., 2015 (Ward and Kach, 2009)
			-	6 replicates per type of experiment (3)	-	Feeding + video-endoscopy and using an electronic particle counter	-	-	Luscher A., 2015 (Ward et al., 2003)
	Pacific oyster	Crassostrea gigas	-	240	-	histology and flow cytometry	control samples	-	Luscher A., 2015 (Sussarellu et al., 2014)
			-	6 replicates per type of experiment (3)	-	Feeding + video-endoscopy and using an electronic particle counter	-	-	Luscher A., 2015 (Ward et al., 2003)
	Atlantic sea scallop	Placopecten magellanicus	-	9 + 2 as controls	-	Microscope observation	2 individuals as controls	-	Luscher A., 2015 (Brilliant and MacDonald, 2000)
			-	27	-	Radiolabelled feed + treatment + radioactivity measured in counts per minute	3 individuals as controls	-	Luscher A., 2015 (Brilliant and MacDonald, 2002)
Crustaceans	Shore crab	Carcinus maenas	-	24		Fluorescence microscope	3 crabs fed with 3 mussels not lab exposed to microplastics		Farrel and Nelson, 2013
			-	-	-	Microscopy	-	-	Luscher A., 2015 (Watts et al., 2014)
	Langoustine or Norway lobster	Nephrops norvegicus	-	36	-	Stereo microscope	Starved and non-plastic fed controls	-	Welden and Cowie, 2016b
	Common goby	Pomatoschistus microps	-	88	-	-	Control without contaminants	-	Luscher A., 2015 (Oliveira et al., 2013)
Urchins	Collector urchin	Tripneustes gratilla	-	-	-	Microscope	Controls without plastic feeding	-	Lusher, 2015 (Kaposi et al., 2014).

## Sheet: Extra references list
Abbasi, S., Soltani, N., Keshavarzi, B., Moore F., Turner A. & Hassanaghaei, M. (2018). Microplastics in different tissues of fish and prawn from the Musa Estuary, Persian Gulf. Chemosphere, 205, 80-87. https://doi.org/10.1016/j.chemosphere.2018.04.076
Akhbarizadeh, R., Moore, F. & Keshavarzi, B. (2018). Investigating a probable relationship between microplastics and potentially toxic elements in fish muscles from northeast of Persian Gulf. Environmental Pollution, 232, 154-163. https://doi.org/10.1016/j.envpol.2017.09.028
Alves, V.E., Patrício, J., Dolbeth, M., Pessanha, A., Palma, A.R., Dantas, E. W. & Vendel, A. L. (2016). Do different degrees of human activity affect the diet of Brazilian silverside Atherinella brasiliensis? Journal of Fish Biology, 89(2),1239-1257. https://doi.org/10.1111/jfb.13023
Avio, C. G., Gorbi, S. & Regoli, F. (2015). Experimental development of a new protocol for extraction and characterization of microplastics in fish tissues: First observations in commercial species from Adriatic Sea. Marine Environmental Research, 111, 18-26. https://doi.org/10.1016/j.marenvres.2015.06.014
Baalkhuyur, F. M., Bin Dohaish, El-J. A., Elhalwagy, M. E. A., Alikunhi, N. M., AlSuwailem, A. M., Røstad, A., Coker, D. J., Berumen, M. L. & Duarte, C. M. (2018). Microplastic in the gastrointestinal tract of fishes along the Saudi Arabian Red Sea coast. Marine Pollution Bulletin, 131, Part A, 407-415. https://doi.org/10.1016/j.marpolbul.2018.04.040
Beer, S., Garm, A., Huwer, B., Dierking, J. & Gissel Nielsen, T. (2018). No increase in marine microplastic concentration over the last three decades – A case study from the Baltic Sea. Science of the Total Environment, 621, 1272-1279. https://doi.org/10.1016/j.scitotenv.2017.10.101
Bellas, J., Martínez-Armental, J., Martínez-Cámara, A., Besada, V. & Martínez-Gómez, C. (2016). Ingestion of microplastics by demersal fish from the Spanish Atlantic and Mediterranean coasts. Marine Pollution Bulletin, 109(1), 55-60. https://doi.org/10.1016/j.marpolbul.2016.06.026
Bessa, F., Barría, P., Neto, J. M., Frias, J.P.G.L., Otero, V., Sobral, P. & Marques J. C. (2018). Occurrence of microplastics in commercial fish from a natural estuarine environment. Marine Pollution Bulletin, 128, 575-584. https://doi.org/10.1016/j.marpolbul.2018.01.044
Besseling, E., Foekema, E. M., Van Franeker, J. A., Leopold, M. F., Kühn, S., Bravo Rebolledo, E. L., Heße, E., Mielke, L., IJzer, J., Kamming, P. & Koelmans, A. A. (2015). Microplastic in a macro filter feeder: Humpback whale Megaptera novaeangliae. Marine Pollution Bulletin, 95(1), 248-252. https://doi.org/10.1016/j.marpolbul.2015.04.007
Braid, H. E., Deeds, J., De Grasse, S. L., Wilson, J. J., Osborne, J. & Hanner, R. H. (2012). Preying on commercial fisheries and accumulating paralytic shellfish toxins: a dietary analysis of invasive Dosidicus gigas (Cephalopoda Ommastrephidae) stranded in Pacific Canada. Marine Biology, 159(1), 25–31. https://doi.org/ 10.1007/s00227-011-1786-4
Bråte, I. L. N., Eidsvoll, D. P., Steindal, C. C. & Thomas, K. V. (2016). Plastic ingestion by Atlantic cod (Gadus morhua) from the Norwegian coast. Marine Pollution Bulletin, 112 (1–2), 105-110. https://doi.org/10.1016/j.marpolbul.2016.08.034
Camedda, A., Marra, S., Matiddi, M., Massaro, G., Coppa, S., Perilli, A., Ruiu, A., Briguglio, P. & de Lucia, G. A. (2014). Interaction between loggerhead sea turtles (Caretta caretta) and marine litter in Sardinia (Western Mediterranean Sea). Marine Environmental Research, 100, 25-32. https://doi.org/10.1016/j.marenvres.2013.12.004
Campani, T., Baini, M., Giannetti, M., Cancelli, F., Mancusi, C., Serena, F., Marsili, L., Casini, S. & Fossi, M. C. (2013). Presence of plastic debris in loggerhead turtle stranded along the Tuscany coasts of the Pelagos Sanctuary for Mediterranean Marine Mammals (Italy). Marine Pollution Bulletin, 74(1), 225-230. https://doi.org/10.1016/j.marpolbul.2013.06.053
Cannon, S. M. E., Lavers, J. L. & Figueiredo, B. (2016). Plastic ingestion by fish in the Southern Hemisphere: A baseline study and review of methods. Marine Pollution Bulletin, 107(1), 286-291. https://doi.org/10.1016/j.marpolbul.2016.03.057
Collard, F., Gilbert, B., Eppe, G., Parmentier, E. & Das K. (2015). Detection of Anthropogenic Particles in Fish Stomachs: An Isolation Method Adapted to Identification by Raman Spectroscopy. Archives of Environmental Contamination and Toxicology, 69(3), 331–339. https://doi.org/10.1007/s00244-015-0221-0
Collard, F., Gilbert, B., Compère, P., Eppe, G., Das, K., Jauniaux, T. & Parmentier, E. (2017). Microplastics in livers of European anchovies (Engraulis encrasicolus, L.). Environmental Pollution, 229, 1000-1005. https://doi.org/10.1016/j.envpol.2017.07.089
Compa, M., Ventero, A., Iglesias, M. & Deudero, S. (2018). Ingestion of microplastics and natural fibres in Sardina pilchardus (Walbaum, 1792) and Engraulis encrasicolus (Linnaeus, 1758) along the Spanish Mediterranean coast. Marine Pollution Bulletin, 128, 89-96. https://doi.org/10.1016/j.marpolbul.2018.01.009
Da Silva Mendes, S., de Carvalho Robson, H., Fonseca de Faria, A. & de Sousa, B. M. (2015). Marine debris ingestion by Chelonia mydas (Testudines: Cheloniidae) on the Brazilian coast. Marine Pollution Bulletin, 92(1–2), 8-10. https://doi.org/10.1016/j.marpolbul.2015.01.010
Davison, P. & Asch, R. (2011). Plastic ingestion by mesopelagic fishes in the North Pacific Subtropical Gyre. Marine Ecology Progress Series, 432, 173–180. https://doi.org/10.3354/meps09142
Desforges, J.-P.W., Galbraith, M. & Ross, P. S. (2015). Ingestion of microplastics by zooplankton in the northeast Pacific ocean. Archi. Environ. Contam. Toxicol. Archives of Environmental Contamination and Toxicology, 69(3), 320-330. https://doi.org/10.1007/s00244-015-0172-5
Devriese, L., Vandendriessche, S., Theetaert, H., Vandermeersch, G., Hostens, K. & Robbens, J. (2014, January). Occurrence of synthetic fibres in brown shrimp on the Belgian part of the North Sea. Platform presentation at the International workshop on fate and impact of microplastics in marine ecosystems (MICRO2014). Plouzane (France).
Devriese, L. I., van der Meulen, M. D., Maes, T., Bekaert, K., Paul-Pont, I., Frère, L., Robbens, J. & Vethaak, A. D. (2015). Microplastic contamination in brown shrimp (Crangon crangon, Linnaeus 1758) from coastal waters of the Southern North Sea and Channel area. Marine Pollution Bulletin, 98(1–2), 179-187. https://doi.org/10.1016/j.marpolbul.2015.06.051
Ferreira, G. V. B., Barletta, M., Lima, A. R. A., Morley, S. A., Justino, A. K. S. & Costa, M. F. (2018). High intake rates of microplastics in a Western Atlantic predatory fish, and insights of a direct fishery effect. Environmental Pollution, 236, 706-717. https://doi.org/10.1016/j.envpol.2018.01.095
Fossi, M. C., Coppola, D., Baini, M., Giannetti, M., Guerranti, C., Marsili, L., Panti, C., de Sabata, E. & Clò, S. (2014). Large filter feeding marine organisms as indicators of microplastic in the pelagic environment: The case studies of the Mediterranean basking shark (Cetorhinus maximus) and fin whale (Balaenoptera physalus). Marine Environmental Research, 100, 17-24. https://doi.org/10.1016/…
Gassel, M., Harwani, S., Park, J. S. & Jahn, A. (2013). Detection of nonylphenol and persistent organic pollutants in fish from the North Pacific Central Gyre. Marine Pollution Bulletin, 73(1), 231–242. https://doi.org/10.1016/j.marpolbul.2013.05.014
Goldstein, M. C. & Goodwin, D. S. (2013). Gooseneck barnacles (Lepas spp.) ingest microplastic debris in the north Pacific subtropical gyre. PeerJ, 1, 184. https://doi.org/10.7717/peerj.184
González, Carman V., Acha, E. M., Maxwell, S. M., Albareda, D., Campagna, C. & Mianzan, H. (2014). Young green turtles, Chelonia mydas, exposed to plastic in a frontal area of the SW Atlantic. Marine Pollution Bulletin, 78(1–2), 56-62. https://doi.org/10.1016/j.marpolbul.2013.11.012
Güven, O., Gökdağ, K., Jovanović, B.$ Kıdeyş, A. E. (2017). Microplastic litter composition of the Turkish territorial waters of the Mediterranean Sea, and its occurrence in the gastrointestinal tract of fish. Environmental Pollution, 223, 286-294. https://doi.org/10.1016/j.envpol.2017.01.025
Hermsen, E., Pompe, R., Besseling, E. & Koelmans, A. A. (2017). Detection of low numbers of microplastics in North Sea fish using strict quality assurance criteria. Marine Pollution Bulletin, 122, (1–2), 253-258. https://doi.org/10.1016/j.marpolbul.2017.06.051
Hoarau, L., Ainley, L., Jean, C. & Ciccione, S. (2014). Ingestion and defecation of marine debris by loggerhead sea turtles, Caretta caretta, from by-catches in the South-West Indian Ocean. Marine Pollution Bulletin 84, 90–96. https://doi.org/10.1016/j.marpolbul.2014.05.031
Ivar do Sul, J. A. & Costa, M. F. (2014). The present and future of microplastic pollution in the marine environment. Environmental Pollution, 185, 352-364. https://doi.org/10.1016/j.envpol.2013.10.036
Kripa, V., Nair, P. G., Dhanya, A. M., Pravitha, V. P., Abhilash, K. S.& Mohammed A. A. (2014). Microplastics in the gut of anchovies caught from the mud bank area of Alappuzha, Kerala. Marine Fisheries Information Service; Technical and Extension Series, 219, 27–28.
Kühn, S., Schaafsma, F. L., van Werven, B., Flores, H., Bergmann, M., Egelkraut-Holtus, M., Tekman, M. B. & van Franeker, J. A. (2018). Plastic ingestion by juvenile polar cod (Boreogadus saida) in the Arctic Ocean. Polar Biology, 41:1269, 1–10. https://doi.org/10.1007/s00300-018-2283-8
Lazar, B. & Gračan R. (2011). Ingestion of marine debris by loggerhead sea turtles, Caretta caretta, in the Adriatic Sea. Marine Pollution Bulletin, 62(1), 43-47. https://doi.org/10.1016/j.marpolbul.2010.09.013
Liboiron, M., Liboiron, F., Wells, E., Richárd, N., Zaharab, A., Matherb, C., Bradshaw, H. & Murichi, J. (2016). Low plastic ingestion rate in Atlantic cod (Gadus morhua) from Newfoundland destined for human consumption collected through citizen science methods. Marine Pollution Bulletin, 113(1–2), 428-437. https://doi.org/10.1016/j.marpolbul.2016.10.043
Lusher, A.,L., McHugh, M. & Thompson R. C. (2013). Occurrence of microplastics in the gastrointestinal tract of pelagic and demersal fish from the English Channel. Marine Pollution Bulletin, 67, (1–2), 15, 94-99. https://doi.org/10.1016/j.marpolbul.2012.11.028
Miranda, D. A. & de Carvalho-Souza, G. F. (2016). Are we eating plastic-ingesting fish? Marine Pollution Bulletin, 103(1–2), 109-114. https://doi.org/10.1016/j.marpolbul.2015.12.035
Murray, F. & Cowie, P. R. (2011). Plastic contamination in the decapod crustacean Nephrops norvegicus (Linnaeus, 1758). Marine Pollution Bulletin, 62(6), 1207-1217. https://doi.org/10.1016/j.marpolbul.2011.03.032
Nadal, M. A., Alomar, C. & Deudero, S. (2016). High levels of microplastic ingestion by the semipelagic fish bogue Boops boops (L.) around the Balearic Islands. Environmental Pollution, 214, 517-523. https://doi.org/10.1016/j.envpol.2016.04.054
Naji, A., Esmaili, Z., Mason, S. A. & Vethaak, D. (2017). The occurrence of microplastic contamination in littoral sediments of the Persian Gulf, Iran. Environmental Science and Pollution Research, 24, 20459-20468. https://doi.org/10.1007/s11356-017-9587-z
Naji, A., Nuri, M. & Vethaak, A. D. (2018). Microplastics contamination in molluscs from the northern part of the Persian Gulf. Environmental Pollution, 235, 113-120. https://doi.org/10.1016/j.envpol.2017.12.046
Nelms, S. E., Galloway, T. S., Godley, B. J., Jarvis, D. S. & Lindeque, P. K. (2018). Investigating microplastic trophic transfer in marine top predators. Environmental Pollution, 238, 999-1007. https://doi.org/10.1016/j.envpol.2018.02.016
Nerland, I. L., Halsband, C., Allan, I. & Thomas, K. V. (2014). Microplastics in marine environments: Occurrence, distribution and effects. REPORT SNO. 6754-2014, Norwegian Institute for Water Research
Ory, N., Chagnon, C., Felix, F., Fernández, C., Ferreira, J. L., Gallardo, C., Garcés Ordóñez, O., Henostroza, A., Laaz, E., Mizraji, R., Mojica, H., Murillo Haro, V., Ossa Medina, L., Preciado, M., Sobral, P., Urbina, M. A. & Thie, M. (2018). Low prevalence of microplastic contamination in planktivorous fish species from the southeast Pacific Ocean. Marine Pollution Bulletin, 127, 211-216. https…
Parker, D. M., Cooke, W. J. & Balazs, G. H. (2005). Diet of oceanic loggerhead sea turtles (Caretta caretta) in the central North Pacific. Fishery Bulletin- National Oceanic and Atmospheric Administration 103(1), 142–152
Pellini, G., Gomiero, A., Fortibuoni, T., Ferrà, C., Grati, F., Tassetti, A. N., Polidori, P., Fabi, G. & Scarcella, G. (2018). Characterization of microplastic litter in the gastrointestinal tract of Solea solea from the Adriatic Sea. Environmental Pollution, 234, 943-952. https://doi.org/10.1016/j.envpol.2017.12.038
Peters, C. A., Thomas, P. A., Rieper, K. B. & Bratton, S. P. (2017). Foraging preferences influence microplastic ingestion by six marine fish species from the Texas Gulf Coast. Marine Pollution Bulletin, 124(1), 82-88. https://doi.org/10.1016/j.marpolbul.2017.06.080
Ramos, J. A. A., Barletta, M. & Costa, M. F. (2012). Ingestion of nylon threads by Gerreidae while using a tropical estuary as foraging grounds. Aquatic Biology, 17, 29–34. https://doi.org/10.3354/ab00461
Rochman, C. M., Tahir, A., Williams, S. L., Baxa, D. V., Lam, R., Miller J. T., Teh, F.-C., Werorilangi, S. & Teh, S. J. (2015). Anthropogenic debris in seafood: Plastic debris and fibers from textiles in fish and bivalves sold for human consumption. Nature Scientific Reports, 5, 14340. http://dx.doi.org/10.1038/srep14340
Romeo, T., Pietro, B., Pedà, C., Consoli, P., Andaloro, F. & Fossi, M. C. (2015). First evidence of presence of plastic debris in stomach of large pelagic fish in the Mediterranean Sea. Marine Pollution Bulletin, 95(1) (2015), 358-361. https://doi.org/10.1016/j.marpolbul.2015.04.048
Rummel, C. D., Löder, M. G. J., Fricke, N. F., Lang, T., Griebeler, E.-M., Janke, M., Gerdts, G. (2016). Plastic ingestion by pelagic and demersal fish from the North sea and Baltic sea. Marine Pollution Bulletin, 102(1), 134-141. https://doi.org/10.1016/j.marpolbul.2015.11.043
Sanchez, W., Bender, C. & Porcher, J.-M. (2014). Wild gudgeons (Gobio gobio) from French rivers are contaminated by microplastics: Preliminary study and first evidence. Environmental Research, 128, 98-100. https://doi.org/10.1016/j.envres.2013.11.004
Smith, L. E. (2018). Plastic ingestion by Scyliorhinus canicula trawl captured in the North Sea. Marine Pollution Bulletin, 130, 6-7. https://doi.org/10.1016/j.marpolbul.2018.03.001
Su, L., Cai, H., Kolandhasamy, P., Wu C., Rochman, C. M. & Shi, H. (2018). Using the Asian clam as an indicator of microplastic pollution in freshwater ecosystems. Environmental Pollution, 234, 347-355. https://doi.org/10.1016/j.envpol.2017.11.075
Tanaka, K. & Takada, H. 2016. Microplastic fragments and microbeads in digestive tracts of planktivorous fish from urban coastal waters. Nature Scientific Reports volume 6, 34351. http://dx.doi.org/10.1038/srep34351
Tourinho, P. S., Ivar do Sul, J. A. & Fillmann, G. (2010). Is marine debris ingestion still a problem for the coastal marine biota of southern Brazil? Marine Pollution Bulletin, 60(3), 396-401. https://doi.org/10.1016/j.marpolbul.2009.10.013
Van Noord, J. E. (2012). Diet of five species of the family Myctophidae caught off the Mariana Islands. Ichthyological Research, 60(1), 89–92. https://doi.org/10.1007/s10228-012-0315-x
Vendel, A. L., Bessa, F., Alves, V. E. N., Amorim, A. L. A., Patrício, J. & Palma, A. R. T. (2017). Widespread microplastic ingestion by fish assemblages in tropical estuaries subjected to anthropogenic pressures. Marine Pollution Bulletin, 117(1–2), 448-455. https://doi.org/10.1016/j.marpolbul.2017.01.081
Welden, N. A. C. & Cowie, P. R. (2016a). Environment and gut morphology influence microplastic retention in langoustine, Nephrops norvegicus. Environmental Pollution, 214, 859-865. https://doi.org/10.1016/j.envpol.2016.03.067
Welden, N. A. C. & Cowie, P. R. (2016b). Long-term microplastic retention causes reduced body condition in the langoustine, Nephrops norvegicus. Environmental Pollution, 218, 895-900. https://doi.org/10.1016/j.envpol.2016.08.020
Wieczorek, A. M., Morrison, L., Croot, P. L., Allcock, A. L., MacLoughlin, E., Savard, O., Brownlow, H. & Doyle, T.K. (2018). Frequency of Microplastics in Mesopelagic Fishes from the Northwest Atlantic. Frontiers in Marine Science, 5, 39. https://doi.org/10.3389/fmars.2018.00039
Wójcik-Fudalewska, D., Normant-Saremba, M. & Anastácio, P. (2016). Occurrence of plastic debris in the stomach of the invasive crab Eriocheir sinensis. Marine Pollution Bulletin, 113(1–2), 306-311. https://doi.org/10.1016/j.marpolbul.2016.09.059
Zhao, S., Zhu, L. & Li, D. (2016). Microscopic anthropogenic litter in terrestrial birds from Shanghai, China: Not only plastics but also natural fibers. Science of the Total Environment, 550, 1110–1115. https://doi.org/10.1016/j.scitotenv.2016.01.112
